1 **Glutamine metabolism modulates chondrocyte inflammatory response**

2

3 Manoj Arra<sup>1</sup>, Gaurav Swarnkar<sup>1</sup>, Naga Suresh Adapala<sup>1</sup>, Syeda Kanwal Naqvi<sup>1</sup>, Lei Cai<sup>1</sup>, Farooq Rai<sup>1</sup>,  
4 Gabriel Mbalaviele<sup>2</sup>, Robert Brophy<sup>1</sup>, Yousef Abu-Amer<sup>1,3,\*</sup>.

5

6 <sup>1</sup>Department of Orthopedic Surgery, <sup>2</sup> Bone and Mineral Division, Department of Medicine,  
7 Washington University School of Medicine, St. Louis, MO 63110 US; and <sup>3</sup>Shriners Hospital for  
8 Children, St. Louis, MO 63110, US.

9

10 \*Correspondence: Yousef Abu-Amer (abuamery@wustl.edu)

11

12 Keywords: Chondrocytes, Metabolism, Glutamine, Inflammation

13

14

15

16 **Abstract:**

17 Osteoarthritis is the most common joint disease in the world with significant societal  
18 consequences, but lacks effective disease modifying interventions. The pathophysiology consists of a  
19 prominent inflammatory component that can be targeted to prevent cartilage degradation and  
20 structural defects. Intracellular metabolism has emerged as a culprit of the inflammatory response in  
21 chondrocytes, with both processes co-regulating each other. The role of glutamine metabolism in  
22 chondrocytes, especially in the context of inflammation, lacks a thorough understanding and is the  
23 focus of this work. We display that chondrocytes utilize glutamine for energy production and anabolic  
24 processes. Furthermore, we show that glutamine deprivation itself causes metabolic reprogramming  
25 and decreases the inflammatory response of chondrocytes through inhibition of NF-κB activity. Finally,  
26 we display that glutamine deprivation promotes autophagy and that ammonia is an inhibitor of  
27 autophagy. Overall, we identify a relationship between glutamine metabolism and inflammatory  
28 signaling and display the need for increased study of chondrocyte metabolic systems.

29

## 1 **Introduction:**

2           Joint disease afflicts millions of individuals around the world, though these conditions are  
3 greatly understudied. While many different diseases can affect the joints, osteoarthritis is the most  
4 common, affecting over 200 million individuals(Allen, Thoma, & Golightly, 2022). Significant  
5 advancements have been made in the treatment of classical inflammatory joint diseases, such as  
6 rheumatoid arthritis or psoriatic arthritis, due to identification of therapeutic targets and  
7 biomarkers(Palfreeman, McNamee, & McCann, 2013; Shams et al., 2021). Disease modifying  
8 compounds, especially with the advent of biologics, have revolutionized the management of these  
9 patients and allowed improved joint outcomes. Osteoarthritis (OA) remains a black sheep in this family  
10 of joint problems, lacking disease modifying interventions. OA can affect many different joints and  
11 presents in a variety of manners, likely contributing to the lack of clear disease pathophysiology or  
12 therapies, though inflammatory and biomechanical factors play a role, amongst other factors (Deveza  
13 & Loeser, 2018; Mobasher & Batt, 2016). OA is characterized by joint degradation, with articular  
14 cartilage damage and joint space narrowing. Clinically, patients have increased pain and loss of joint  
15 mobility that can progress to significantly impair functionality. Interventions include use of NSAID's and  
16 intra-articular steroid injections for pain relief, as well as joint replacement surgeries. However, there  
17 are currently no medications for preventing or reversing joint damage caused by osteoarthritis, and  
18 several clinical trials have failed(Hermann, Lambova, & Muller-Ladner, 2018). Furthermore, the disease  
19 is indolent and slowly progressing, often presenting with its classical symptoms long after joint  
20 degradation has begun and usually long after inciting factors such as joint injury have taken place  
21 (Blasioli & Kaplan, 2014; Roos & Arden, 2016). Clearly, there is a need for novel biomarkers,  
22 therapeutic targets, and overall understanding of disease pathophysiology.

23           Various groups have shown that inflammation is a driver of OA, even though it may not present  
24 like traditional inflammatory diseases such as rheumatoid arthritis (Arra, Swarnkar, Alippe, Mbalaviele,  
25 & Abu-Amer, 2022; Arra et al., 2020; Goldring & Otero, 2011). Joint inflammation causes cartilage-  
26 resident chondrocytes, as well as other joint infiltrating cells, to generate catabolic enzymes to  
27 promote an overall joint degradative state(Blasioli & Kaplan, 2014). Inflammatory stimuli activate  
28 signaling pathways such as the NF- $\kappa$ B pathway, which are important drivers of OA disease but have not  
29 been successfully targeted in OA(Arra et al., 2022; Arra et al., 2020; Catheline et al., 2021; Choi, Jo,

1 Park, Kang, & Park, 2019). These stimuli can range from cytokines, to mechanical stress to inorganic  
2 particulate matter, making it difficult to target specific inflammatory mediators(Liu-Bryan &  
3 Terkeltaub, 2015; van den Bosch, 2019). Due to this, it is necessary to identify targetable cellular  
4 processes that modulate downstream inflammatory and catabolic activity in articular chondrocytes in  
5 response to a variety of stimuli.

6 Metabolic reprogramming is one such process that has gained interest in various cell types and  
7 disease state as a disease driver, and may also be important in OA (Chiellini, 2020; L. Zheng, Zhang,  
8 Sheng, & Mobasher, 2021). Intracellular metabolism does far more than energy production and can  
9 modulate the inflammatory response of cells through regulation at various levels, ranging from  
10 epigenetics modifications to redox modulation(Gaber, Strehl, & Buttgereit, 2017; Lu & Wang, 2018). As  
11 such, chondrocyte intracellular metabolism has come into focus recently as a potential therapeutic  
12 target for modulating catabolic activity through regulation of inflammatory signaling pathways.  
13 Supporting this finding, we have shown recently that inflammatory stimuli alter the metabolism of  
14 chondrocyte, which can then regulate inflammatory responses (Arra et al., 2020).

15 Glucose metabolism has been fairly extensively studied in chondrocytes, though the role of  
16 other substrate pathways, such as fatty acid or amino acid metabolism, has been less well-studied.  
17 However, understanding the role of these other substrate pathways is critical since many metabolic  
18 pathways are interconnected and likely play a role in OA pathogenesis. In support of this claim, several  
19 groups have displayed recently that modulation of metabolic pathways can protect against OA and RA  
20 in animal models (Abboud et al., 2018; Coleman et al., 2018; Liu-Bryan, 2015; Ohashi et al., 2021; Shen  
21 et al., 2019). In humans, studies have shown that OA and RA joints have altered metabolite levels in  
22 the synovial fluid, though it is unclear if these changes are due to disease or drivers of disease(Akhbari  
23 et al., 2020; Kim et al., 2014; Zhai, 2019; K. Zheng et al., 2017). Finally, it has been displayed that  
24 systemic metabolic diseases such as obesity, diabetes and hypercholesterolemia (Baudart, Louati,  
25 Marcelli, Berenbaum, & Sellam, 2017) likely influence OA development, potentially through nutrient  
26 availability(Sellam & Berenbaum, 2013; Zhuo, Yang, Chen, & Wang, 2012). Based on these findings, it is  
27 probable that altered cell metabolism can be used not only as a biomarker of joint health but also as a  
28 therapeutic target. To help address some of the knowledge gaps in the field, we focused in this study  
29 on the role of glutamine in chondrocyte physiology and in response to inflammatory stimulation.

1           Glutamine is highly abundant throughout the body and is essential for many anabolic  
2 processes, but can also be utilized for energy production(Cruzat, Macedo Rogero, Noel Keane, Curi, &  
3 Newsholme, 2018). Some recent studies have elaborated the function of glutamine metabolism in  
4 chondrocyte physiology, though more understanding is required. One group demonstrated that  
5 inflammatory stimulation altered glutamine uptake and glutamate release in chondrocytes, with  
6 glutamate receptor involved in modulation of chondrocytes inflammatory response(Piepoli et al.,  
7 2009). Another group showed that glutamine metabolism is critical for regulating anabolic activity,  
8 glutathione production and epigenetic modifications in chondrocytes (Stegen et al., 2020).  
9 Furthermore, several studies have highlighted that glutamine levels are altered in synovial fluid of  
10 OA(Akhbari et al., 2020; Anderson et al., 2018). These studies highlight that glutamine is likely to be an  
11 important substrate for chondrocytes, both in healthy and disease states. In this study, we aim to  
12 characterize the role of glutamine metabolism in the inflammatory response of chondrocytes. We  
13 focus on NF- $\kappa$ B signaling as well as autophagy, both of which have been shown to be cooperatively  
14 important players in OA disease.

15

## 16 **Results:**

17

### 18 **Chondrocytes utilize glutamine for intracellular energy metabolism**

19           We have previously displayed that chondrocytes under inflammatory conditions undergo  
20 metabolic reprogramming, with increased reliance upon glycolysis and decreased oxidative  
21 phosphorylation (Arra et al., 2020). Several studies have demonstrated that there is mitochondrial  
22 dysfunction with inflammatory stimulation(Arra et al., 2020; Lopez-Armada et al., 2006). During these  
23 conditions, there is decreased reliance upon glucose as a source of TCA cycle substrates, though other  
24 energy substrates such as glutamine can still fuel TCA activity to drive anabolic reactions (Martinez-  
25 Reyes & Chandel, 2020; Meiser et al., 2016). Thus, we seek to determine if chondrocytes can utilize  
26 glutamine to fuel anaplerotic TCA cycle activity. We observe that IL-1 $\beta$  stimulation alters the  
27 expression of glutamine and glutamate transports, as well as several key glutamine metabolic enzymes  
28 (Fig 1A-E).

1            However, enzyme expression may not necessarily reflect glutamine utilization. To determine  
2 this, we measured viability of chondrocytes in the presence or absence of glutamine. Culturing  
3 chondrocytes in glutamine free media led to a slight decrease in viability, suggesting that chondrocytes  
4 require glutamine for energy production (Fig 1F). Since the first step of glutamine metabolism and  
5 entry to TCA cycles is conversion to glutamate, a process catalyzed by glutaminase (GLS), we utilized a  
6 GLS inhibitor, CB-839, which mimics the effect of glutamine deprivation on cell metabolism by  
7 preventing glutamate generation. We confirmed that GLS inhibition significantly reduced intracellular  
8 glutamate to levels approaching that of glutamine deprivation (Fig 1G). We also observed a decrease in  
9 ATP levels with GLS inhibition, further confirming that chondrocytes do utilize glutamine for energy  
10 production (Fig 1H). Given that chondrocytes clearly rely upon glutamine, we then performed Seahorse  
11 analysis to confirm that chondrocytes utilized glutamine for metabolism and energy production. We  
12 note that IL-1 $\beta$  stimulation increases glycolysis and causes a dramatic decrease in OxPhos, likely via  
13 mitochondrial dysfunction (Fig 1I-L). We observed that glutamine deprivation led to a decrease in both  
14 extracellular acidification rate (ECAR) and oxygen consumption rate (OCR), with a more dramatic effect  
15 on OCR, likely due to contribution of glutamine to TCA anaplerotic activity (Fig 1I-L). We observe similar  
16 effects with GLS inhibition, indicating that glutamine breakdown by GLS is an essential step for energy  
17 metabolism (Figure 1 Figure Supplement 1A-D).

18            We sought to determine if human OA cartilage also displays altered expression of glutamine  
19 metabolic enzymes. We noted that human OA cartilage display increased expression of various  
20 glutamine metabolic enzymes (Figure 1 Figure Supplement 1 E-H), potentially suggesting increased  
21 glutamine metabolism. We validate that OA cartilage is more catabolic and inflammatory through  
22 measurement of NF- $\kappa$ B Inhibitor Zeta (*Nfkbiz*) and Matrix metalloprotease 3 (*Mmp3*) expression,  
23 respectively (Fig I-J). We also note that IL-1 $\beta$  stimulation of human chondrocytes isolated from knee  
24 cartilage caused some glutamine metabolic enzyme changes, though less significantly than OA  
25 chondrocytes (Figure 1 Figure Supplement 1K-M), indicating that metabolic changes in human cells  
26 may be a chronic change or in response to other inflammatory stimuli.

27

28 **Glutamine deprivation causes metabolic reprogramming to inhibit glycolysis**

1 We were surprised to observe that glutamine deprivation of chondrocytes was able to cause a  
2 reduction in both glycolysis and oxidative phosphorylation, given that glutamine primarily supplies TCA  
3 cycle activity(Yoo, Yu, Sung, & Han, 2020). We sought to determine what impact glutamine deprivation  
4 may have on systems such as glycolysis which tend to primarily utilize glucose, especially in the context  
5 of inflammation. Furthermore, we have previously displayed that metabolic reprogramming towards  
6 increased glycolysis induced by IL-1 $\beta$  can promote catabolic activity and OA disease(Arra et al., 2020).

7 We observe that glutamine deprivation itself was able to induce metabolic reprogramming that  
8 supports TCA activity. We noted increased expression of glutaminase (*Gls*) with glutamine deprivation  
9 (Figure 2 Supplement 2A) and slight increase in some TCA cycles enzyme expression such as malate  
10 dehydrogenase (*Mdh*) and Succinate dehydrogenase subunit A (*Sdha*), with insignificant changes in  
11 others (Figure 2 Supplement 2B-E). However, glutamine deprivation inhibited the expression of various  
12 glycolytic and pentose phosphate pathway (PPP) enzymes (Fig 2A-C). Furthermore, we observe that  
13 glutamine deprivation can prevent many of the glycolytic and PPP enzymes metabolic changes  
14 observed with IL-1 $\beta$  stimulation (Fig 2A-C). This is further supported by the finding that glutamine  
15 deprivation can reduce lactate production by chondrocytes, a marker of glycolytic activity (Figure 2  
16 Supplement 2F). Based on our findings, it appears that glutamine deprivation supports TCA cycle  
17 activity, but inhibits glycolysis and PPP. This may be a compensatory mechanism utilized by cells in the  
18 absence of glutamine to sustain ATP production via utilization of the energy favorable TCA cycle, as  
19 well as anabolic activity.

20 We then performed some targeted proteomics in the context of glutamine deprivation (Fig 2D-  
21 E) and noted that glutamine deprivation does not reduce levels of TCA metabolites such as  $\alpha$ -KG,  
22 malate, and oxaloacetate, but does reduce levels of pyruvate generated from glycolysis (Fig 2D-K).  
23 However, we did note that glutamine is in fact required for the production of various downstream  
24 substrates, such as asparagine and aspartate (Fig 2I-J). Given that glutamine deprivation reduced  
25 OxPhos activity and ATP levels, but did not reduce TCA metabolite levels, chondrocytes may be able to  
26 generate TCA metabolites by utilization of other anaplerotic processes. These systems can generate  
27 metabolites but usually do not generate energy. As an example, we noted increased expression of  
28 *Psat1* with glutamine deprivation (Figure 2 Supplement 2G), which has recently been displayed to be  
29 one source of glucose-based  $\alpha$ -KG to fuel TCA cycle (Hwang et al., 2016).

1

## 2 **Glutamine metabolism by glutaminase contributes to inflammatory gene expression**

3 We have previously displayed that altered metabolism can regulate the inflammatory and  
4 catabolic response of chondrocytes. Since the metabolic changes induced by glutamine deprivation  
5 opposed the metabolic changes we observe with IL-1 $\beta$  stimulation, we suspected that glutamine may  
6 also play a role in modulating the inflammatory response induced by IL-1 $\beta$ .

7 To determine the role of glutamine metabolism in the inflammatory response, we cultured  
8 chondrocytes in media with and without glutamine under sufficient glucose conditions and treated  
9 them with IL-1 $\beta$ . We observed that glutamine deprivation led to a decrease in inflammatory and  
10 catabolic gene expression in response to IL-1 $\beta$ , with a reduction in expression of genes such as  
11 Interleukin 6 (*Il6*) and Matrix metalloprotease 13 (*Mmp13*) (Fig 3A-B). We then sought to determine  
12 the mechanism by which glutamine can regulate the inflammatory response. We measured NF- $\kappa$ B  
13 activity since it is the principle inflammatory response pathway to IL-1 $\beta$  that we have previously  
14 demonstrated is important for OA development (Arra et al., 2022; Arra et al., 2020). We observe using  
15 chondrocytes derived from p65-luciferase reporter mice that glutamine deprivation dose dependently  
16 inhibits NF- $\kappa$ B activation, as measured by luciferase activity (Fig 3C). It has also previously been  
17 displayed that I $\kappa$ B- $\zeta$  is another critical pro-inflammatory mediator of NF- $\kappa$ B activity in chondrocytes  
18 treated with IL-1 $\beta$  (Arra et al., 2022; Choi, Maruyama, Chun, & Park, 2018). We observe that glutamine  
19 deprivation leads to a decrease in I $\kappa$ B- $\zeta$  protein expression and stability, at least partially due to  
20 inhibition of NF- $\kappa$ B activity (Fig 3D). Our earlier work has also shown that I $\kappa$ B- $\zeta$  is a redox sensitive  
21 protein that is stabilized by oxidative stressors from metabolic sources such as LDHA and the  
22 mitochondria, so we measured ROS levels in the absence of glutamine in response to IL-1 $\beta$  stimulation.  
23 We surprisingly observed decreased ROS production in the absence of glutamine (Fig 3E), likely due to  
24 decreased inflammatory response and a reduction in pro-oxidative metabolic changes we have  
25 previously characterized.

26 We then interrogated if glutaminase inhibition can modulate the inflammatory response similar  
27 to glutamine deprivation. We observed that glutaminase inhibition by CB-839 was also effective at  
28 decreasing the inflammatory response, suggesting that glutamine to glutamate conversion is important  
29 for the inflammatory response (Figure 3 Supplement 3A). We also observed that glutaminase inhibition

1 was also able to potently decrease I $\kappa$ B- $\zeta$  protein expression (Figure 3 Supplement 3B), indicating that  
2 glutaminolysis contributes to I $\kappa$ B- $\zeta$ -mediated gene expression. Furthermore, GLS inhibition reduced NF-  
3  $\kappa$ B activation (Figure 3 Supplement 3C).

4 The glutaminolysis reaction performed by GLS generates glutamate and free ammonia from  
5 glutamine(Yoo et al., 2020). Glutamate can then be converted to  $\alpha$ -ketoglutarate, glutathione or  
6 undergo transaminase reactions. On the other hand, ammonia is a reactive species, often viewed as a  
7 waste product, and can be incorporated into amino acids or urea for its removal(Kurmi & Haigis, 2020;  
8 Spinelli et al., 2017). We sought to determine if glutamate or ammonia generated by GLS can regulate  
9 the inflammatory response of chondrocytes. We supplemented chondrocytes with ammonia or  
10 glutamate and measured the inflammatory response. We observed that ammonia supplementation  
11 was pro-inflammatory, activating NF- $\kappa$ B and increasing I $\kappa$ B- $\zeta$  gene expression in the setting of IL-1 $\beta$   
12 stimulation (Fig 3F, Figure 3 Supplement 3D). It also increased expression of inflammatory and  
13 catabolic genes (Fig 3G-H). Ammonia supplementation also partially rescued inflammatory gene  
14 expression under glutamine deprivation conditions and I $\kappa$ B- $\zeta$  protein expression. Glutamate  
15 supplementation did not have a significant impact on NF- $\kappa$ B activation (Figure 3 Supplement 3D), and  
16 was unable to rescue I $\kappa$ B- $\zeta$  expression (Figure 3 Supplement 3E). This finding suggests that ammonia  
17 generation from glutamine metabolism may be involved in promoting inflammation.

18 Given that we did not observe an increase in inflammation with glutamate supplementation,  
19 we then tested the efficacy of GDH inhibitor, EGCG, which blocks the conversion of glutamate to  $\alpha$ -  
20 KG(Li et al., 2006), a process that also releases an ammonia group and is critical for the generation of  
21 pro-inflammatory downstream metabolites such as succinate. We note that EGCG treatment also  
22 slightly reduced the inflammatory response represented by *Il6* expression, though less potently than  
23 glutamine deprivation (Figure 3 Supplement 3F).

24

## 25 **Glutamine deprivation activates autophagy**

26 Since it is well known that nutrient deprivation can induce autophagy(Russell, Yuan, & Guan,  
27 2014), we sought to determine what impact glutamine deprivation would have on chondrocyte  
28 autophagy processes, especially in the context of inflammation. We note that IL-1 $\beta$  stimulation of  
29 chondrocytes leads to a decrease in autophagy, as noted by accumulation of p62 protein. We then



1 observe that there is an upregulation of autophagy with glutamine deprivation, as indicated by a  
2 decrease in p62 protein, which is often an indication of autophagy progression as p62 is degraded by  
3 autophagosomes (Fig 4A). We also note a significant decrease in LC3 protein levels with glutamine  
4 deprivation due to increased consumption of LC3 through autophagy. We validated this through  
5 chloroquine treatment, an inhibitor of autophagy, which can rescue LC3 and p62 levels in glutamine  
6 deprivation conditions, indicating that LC3 and p62 are being processed by autophagy processes. We  
7 validated these findings by immunofluorescence, which displayed that chloroquine treatment led to far  
8 greater increase in LC3-positive punctate in cells under glutamine deprivation conditions compared to  
9 glutamine replete conditions (Fig 4B). We confirm that findings are due to protein processing since we  
10 do not observe similar changes at the gene expression level (Figure 4 Supplement 4A-B). Interestingly,  
11 we note that glutamine deprivation also leads to a transient decrease in gene expression of  
12 Microtubule-associated protein 1A light chain 3b (*Lc3b*) and sequestosome (*p62*) at less than 24 hours,  
13 which recovers at the 24 hour timepoint (Figure 4 Supplement 4C-D). We also observe that LC3 protein  
14 levels start to decrease rapidly with glutamine deprivation but p62 levels do not decrease until 48  
15 hours (Figure 4 Supplement 4E). We observed similar effects with GLS inhibition by CB-839 (Figure 4  
16 Supplement 4F).

17 We then supplemented chondrocytes deprived of glutamine with glutamate or ammonia and  
18 measured levels of LC3 and p62 to determine how glutaminolysis affects autophagy. We noted  
19 ammonia supplementation was able to inhibit autophagy and reverse the effect of glutamine  
20 deprivation on LC3 and p62 expression, similar to chloroquine treatment (Fig 4C, Figure 4 Supplement  
21 4G). Ammonia treatment led to an increase in LC3b and p62, likely through blockade of  
22 autophagosome-lysosome fusion. We also observe that glutamate supplementation appeared to  
23 increase autophagy, as noted by a decrease in p62 levels (Fig 4D, Figure 4 Supplement 4G). These  
24 findings were confirmed through increased number of LC3 positive punctate in ammonia treated cells  
25 but not in glutamate treated cells, indicating opposing effects of ammonia and glutamate on  
26 autophagy (Fig 4E).

27 One of the major cell stress response factors involved in regulating metabolism and autophagy  
28 is Activating transcription factor 4 (ATF4), which can modulate intracellular metabolism (B'Chir et al.,  
29 2013; O'Leary et al., 2020; Stegen et al., 2022). Mechanistically, we observe that glutamine deprivation

1 is able to increase ATF4 protein expression, which is reduced with IL-1 $\beta$  stimulation (Figure 4  
2 Supplement 4H-I). We note that at around 12 hours of glutamine deprivation, *Atf4* expression  
3 increases (Figure 4 Supplement 4J). ATF4 activation is a well-known response system to amino acid  
4 deprivation, and it is known to be a driver of autophagy processes (Jin, Hong, Kim, Jang, & Park, 2021;  
5 Ye et al., 2010). ATF4 is also a mediator of metabolic reprogramming, which we observe with glutamine  
6 deprivation and IL-1 $\beta$  stimulation. Suspecting that ATF4 may be important in OA, we note that OA  
7 mouse cartilage (MLI) has decreased expression of ATF4, mimicking the effect of IL-1 $\beta$  stimulation  
8 (Figure 4 Supplement 4K). Based on these results, it is predicted that ATF4 may be an anti-  
9 inflammatory factor and will be the focus of future work.

10

11

## 12 **mTOR2 but not mTOR1 is activated by glutamine deprivation**

13 Since mTOR signaling is another critical factor connecting metabolism and autophagy, we  
14 interrogated mTOR activation in the setting of glutamine deprivation and inflammation. mTOR  
15 activation has been shown to be a driver of metabolic changes, especially for glycolytic pathways (Linke,  
16 Fritsch, Sukhbaatar, Hengstschlager, & Weichhart, 2017; Magaway, Kim, & Jacinto, 2019). Glutamine  
17 deprivation decreased glycolysis and glycolytic enzyme expression, hence we suspected that mTOR  
18 modulation may be involved. We note that mTOR1 and mTOR2 activity is increased with IL-1 $\beta$   
19 stimulation as measured by increased phosphorylation of S6 riboprotein and phosphorylation of AKT-  
20 473 (Fig 5A-B), supporting the inhibition in autophagy we previously measured. With glutamine  
21 deprivation, we noticed a decrease in mTOR1 activity with glutamine deprivation, as measured by  
22 phosphorylation of S6 ribosomal protein but an increase in mTOR2 activity, as measured by increased  
23 AKT-473 phosphorylation (Fig 5A-B).

24 We then utilized rapamycin, an mTOR1 inhibitor, to interrogate the role of mTOR in the  
25 inflammatory response and glutamine metabolic gene expression changes. We validate that rapamycin  
26 can block mTOR1 activation through complete abrogation of phospho-S6 expression (Figure 5  
27 Supplement 5A). We display that rapamycin treatment can reverse some metabolic changes induced  
28 by IL-1 $\beta$ , such as increased glycolytic enzyme expression using LDHA as a representative gene (Figure 5  
29 Supplement 5B). We also note that rapamycin treatment is able to upregulate expression of Glutamine

1 synthase (*Gs*) and *Gls*, but did not affect glutamic-oxaloacetic transaminase 2 (*Got2*) expression (Figure  
2 5 Supplement 5C-E). However, under glutamine deprivation conditions, rapamycin treatment only  
3 affected *Gls* expression, but not *Gs* or *Got2*. We then measured the impact of mTOR1 inhibition by  
4 rapamycin on the inflammatory response, and surprisingly observed that rapamycin increases the  
5 expression of inflammatory and catabolic genes (Fig 5C-D). It also reverses some of the inflammatory  
6 inhibition induced by glutamine deprivation, suggesting an important role for mTOR1 in the anti-  
7 inflammatory effect of glutamine deprivation.

8

9

## 10 **Discussion:**

11 This work displays that glutamine utilization by chondrocytes is important for their physiology  
12 and inflammatory response, and may be an important player in OA. We show that chondrocytes utilize  
13 glutamine for energy production even when glucose is abundant, indicating that chondrocytes rely  
14 upon multiple substrates for metabolism. However, we observe that glutamine deprivation is able to  
15 decrease chondrocyte glycolysis and oxidative phosphorylation, which was surprising since prior  
16 groups have mainly described glutamine as fueling the TCA cycle in the mitochondria. This finding was  
17 explained when we noted that glutamine deprivation caused metabolic reprogramming to inhibit  
18 glycolytic activity by significantly decreasing expression of glycolytic enzymes, but maintained TCA  
19 metabolites. This was a surprising new interaction between glutamine and glucose metabolism which  
20 may be a compensatory mechanism that forces chondrocytes to rely upon other energy sources such  
21 as fatty acid oxidation to maintain anabolic processes. In addition, this reprogramming caused by  
22 glutamine deprivation may actually be protective in the context of inflammation, as will be discussed  
23 further. Future work utilizing an untargeted metabolomics approach will be useful for understanding  
24 the contribution and interactions of various substrate pathways to chondrocyte metabolism and  
25 physiology.

26 From an inflammatory standpoint, which is important for OA pathophysiology and cartilage  
27 degradation, we observed that glutamine deprivation was able to decrease chondrocyte expression of  
28 inflammatory and catabolic genes in response to IL-1 $\beta$  stimulation. Mechanistically, we observed  
29 decreased NF- $\kappa$ B activation and expression of I $\kappa$ B- $\zeta$  with glutamine deprivation. We also note that

1 glutamine deprivation reduces ROS generation by IL-1 $\beta$  stimulation, which we have previously shown is  
2 protective and can block I $\kappa$ B- $\zeta$  expression(Arra et al., 2022; Arra et al., 2020). This effect may be  
3 mediated via the metabolic reprogramming induced by glutamine deprivation, reversing metabolic  
4 changes induced by IL-1 $\beta$  that we have previously shown are pro-inflammatory. For example, LDHA  
5 and PPP activity has previously been shown to be pro-inflammatory in chondrocytes(Arra et al., 2020),  
6 but these processes are decreased in the setting of glutamine deprivation. Through this manner,  
7 glutamine deprivation may further decrease the inflammatory response through a reduction in  
8 oxidative stressors and metabolic modulation.

9 We then noted that glutamine deprivation is able to promote autophagy and activates stress  
10 response systems such as ATF4 pathway. These systems are likely required for maintenance of amino  
11 acid levels and anabolic activity in the absence of glutamine. However, autophagy and stress systems  
12 have also been shown to be protective and may hold therapeutic potential(Aman et al., 2021). For  
13 example, intermittent fasting and rapamycin as autophagy promoting compounds have gained interest  
14 recently as modalities for driving protective-autophagy(Johnson, Rabinovitch, & Kaeberlein, 2013;  
15 Mattson & de Cabo, 2020). Our prior work has also displayed that autophagy can also regulate  
16 inflammatory responses through modulation of NF- $\kappa$ B and other pathways(Adapala et al., 2020), which  
17 may be involved in the anti-inflammatory effect of glutamine deprivation. Our future work will focus  
18 on understanding the role of ATF4 stress response system and autophagy in the modulation of  
19 chondrocyte inflammatory response and NF- $\kappa$ B activity.

20 Our work then focused on the GLS reaction, which is one of the rate limiting steps of glutamine  
21 metabolism(Herranz, 2017). We displayed that ammonia is an inhibitor of autophagy and promotes  
22 inflammatory responses, while glutamate is not. Prior studies on the role of ammonia in regulation of  
23 autophagy have demonstrated that ammonia is able to both induce and inhibit autophagy through  
24 various mechanisms(Soria & Brunetti-Pierri, 2019). It is possible that ammonia derived from glutamine  
25 may be pathological, especially if it is not appropriately recycled. The role of ammonia and ammonia-  
26 removal processes in chondrocytes requires further study, especially in the context of inflammation, to  
27 determine their importance in joint disease. In addition, measurement of ammonia levels in synovial  
28 fluid may provide insight into the health of OA and RA joints. Our finding that glutamate treatment  
29 does not influence inflammatory response is in agreement with a prior study showing that exogenous

1 glutamate did not influence inflammatory response of chondrocytes, although NMDA receptor  
2 blockade was anti-inflammatory, raising interesting questions about the role of glutamate in  
3 chondrocyte physiology(Piepoli et al., 2009). Overall, our work suggests that glutaminolysis may be  
4 pro-inflammatory through the production of ammonia which can block protective autophagy, unless  
5 systems exist for ammonia incorporation and removal that can prevent this effect.

6 The results of this work lays the foundation for further investigation into glutamine metabolism  
7 as a possible therapeutic target. Several inhibitors exist that may hold some therapeutic potential, such  
8 as the glutaminase inhibitor CB-839, which is currently in clinical trials for anti-tumor potential and can  
9 be repurposed for the treatment of OA. Use of genetic mouse models will also provide more detailed  
10 *in vivo* pre-clinical information when combined with OA models. In addition, further work will be  
11 performed to determine if glutamine and downstream metabolite levels can be correlated to OA  
12 disease severity, allowing for the development of biomarkers. Another major knowledge gap is the  
13 understanding of non-glutamine amino acid and fatty acid utilization by chondrocytes, which can be  
14 performed through combined metabolomic, proteomic and transcriptomics based approaches. Finally,  
15 more work needs to be performed using human samples such as articular cartilage and synovial fluid to  
16 create better translational models since OA is unlikely to be a single disease entity but a variety of sub-  
17 conditions with their own unique pathophysiology(Deveza & Loeser, 2018). A complete understanding  
18 of chondrocyte metabolism may provide an expanded toolbox for the understanding of OA and give  
19 rise to a personalized approach for patient treatment.

20

21 **Competing financial interests:** The authors have declared that no conflict of interest exists.

22

### 23 **Acknowledgements:**

24 This work is supported by NIH/NIAMS R01-AR072623 (to YA), Biomedical grant from Shriners Hospital  
25 for Children (YA), P30 AR074992 NIH Core Center for Musculoskeletal Biology and Medicine (to YA),  
26 R01-AR076758 and R01-AI161022 (to GM).

27

### 28 **Author Contributions:**

1 M.A., G.S., G.M., Y.A., participated in study design. M.A., G.S., N.S.A., K.N., L.C., performed  
2 experiments, F.R., and R.B., provided material, advice and troubleshooting, M.A., and G.S., analyzed  
3 data. M.A., and Y.A., guided the general outline and experimental approach of the project and wrote  
4 the manuscript.

5

## 6 **Materials and methods:**

7

### 8 **Animals**

9

10 Male and female mice on C57BL/6 background were used. All the animals were housed at the  
11 Washington University School of Medicine barrier facility. All experimental protocols were carried out  
12 in accordance with the ethical guidelines approved by the Washington University School of Medicine  
13 Institutional Animal Care and Use Committee (approved protocol #21-0413).

14

### 15 **Murine Cell Culture**

16

17 For murine chondrocyte experiments, chondrocytes were isolated from sterna of newborn pups  
18 (C57BL/6J) age P1-P3 without consideration for sex. Cells were isolated by sequential digestion with  
19 pronase (2 mg/mL, PRON-RO, Roche) at 37 degrees, followed by collagenase D (3 mg/mL, COLLD-RO,  
20 Roche) two times at 37 degrees, and cultured in DMEM (Life Technologies, Carlsbad, CA USA)  
21 containing 10% FBS and 1% penicillin/streptomycin (15140122, ThermoFisher, Waltham, MA USA) and  
22 plated in tissue culture plates. For glutamine deprivation conditions, media was changed to high  
23 glucose DMEM containing glutamine or devoid of glutamine (Life Technologies, Carlsbad, CA USA). For  
24 experiments, cells are treated with recombinant mouse IL-1 $\beta$  (211-11B, Peprotech, Cranbury, NJ USA)  
25 at 10 ng/mL, CB-839 (S7655, Selleck, Chemicals, Houston, TX USA), rapamycin (HY-10219, MedChem  
26 Express, Monmouth Junction, NJ USA), ammonium chloride (A9434, Sigma-Aldrich, USA), or L-  
27 glutamic acid (G1626, Sigma-Aldrich, St. Louis, MO USA).

28

### 29 **Human Cell Culture**

1

2 Cartilage fragments from discarded tissue post-surgery were collected in Dulbecco's Modified Eagle  
3 Medium: Nutrient Mixture F-12 (DMEM/F-12, Gibco, ThermoFisher, Waltham, MA USA) containing  
4 10% heat-inactivated fetal bovine serum (FBS, Gibco, ThermoFisher, Waltham, MA USA), 2% penicillin  
5 and streptomycin (10,000 U/mL, Gibco, ThermoFisher, Waltham, MA USA). Tissue fragments were  
6 digested using an enzyme cocktail containing 0.025% collagenase P (Roche, 1.5 U/mg) and 0.025%  
7 pronase (Roche, 7 U/mg)] in complete DMEM/F-12 medium in a spinner flask. After incubation at 37°C  
8 for overnight, the digest was filtered through 70 µm pore-size cell strainer and centrifuged at 1500 rpm  
9 for 5 min. Pellet was washed with calcium- and magnesium-free Hank's Balanced Salt Solution (HBSS,  
10 Gibco, ThermoFisher, Waltham, MA USA) and suspended in complete DMEM/F-12 supplemented with  
11 50 mg/L L-ascorbic acid.

12

### 13 **MLI model**

14

15 Meniscal-ligamentous injury (MLI) surgery was utilized to induce OA in mice. In this procedure, medial  
16 meniscus was surgically removed from the joint without disrupting patella or other ligaments. Sham  
17 surgery was performed on the contralateral joint in which a similar incision is made on the medial side  
18 without removal of the meniscus. After 2 weeks (acute phase), mice are sacrificed and joints were  
19 collected for histology.

20

### 21 **Immunohistochemistry**

22

23 Mouse long bones were harvested keeping knee joints intact and fixing in 10% neutral buffered  
24 formalin for 24 hours at room temperature followed by decalcification in Immunocal (StatLab,  
25 McKinney, TX) for 3 days with fresh Immunocal changed every 24 hours. Tissues were processed,  
26 embedded into paraffin, and sectioned 5 µm thick then stained with Hematoxylin-Eosin or Safranin-O  
27 to visualize cartilage and bone. For immunohistochemistry, sections were deparaffinized and  
28 rehydrated using 3 changes of xylenes followed by ethanol gradient. Antigen retrieval in murine  
29 sections was performed by incubating samples in Citrate buffer (pH 6.0) at 55 degrees Celsius

1 overnight, followed by washing in PBS and subsequent quenching of endogenous peroxidase activity by  
2 incubation in 3% H<sub>2</sub>O<sub>2</sub> for 15 minutes at room temperature. Sections were then blocked using blocking  
3 solution (10% normal goat serum, 5% BSA, 0.1% Tween-20) for 1 hour at room temperature. Sections  
4 were incubated overnight at 4 degrees with anti-ATF4 (10835-1-AP, ThermoFisher, Waltham, MA USA,  
5 RRID: AB\_2058600) antibody at a 1:200 dilution. Sections were rinsed in phosphate-buffered saline  
6 (PBS) several times followed by addition of 1:500 dilution of biotinylated secondary antibody (BP-1100,  
7 Vector Biolabs, Burlingham, CA) for one hour. Post-secondary antibody incubation, sections were  
8 washed with PBS-T several times followed by incubation with streptavidin-HRP (2 µg/ml) for 20 min.  
9 After extensive washing with PBS, sections were developed using DAB peroxidase kit (SK4100, Vector  
10 Biolabs, Burlingham, CA), with development on each slide standardized to the same amount of time.

11

## 12 **Protein analysis by Immunoblotting**

13

14 Cell lysates for protein analysis were prepared by scraping cells in 1x Cell Lysis Buffer (Cell Signaling  
15 Technology, Danvers, MA, USA) containing 1x protease/phosphatase inhibitor (Thermo Fisher  
16 Scientific, Waltham, MA USA Halt Protease Phosphatase Inhibitor Cocktail). Blotting was performed  
17 using primary antibodies for LC3B (2775, CST, Danvers, MA USA, RRID:AB\_915950), p62 (2C11, Abnova,  
18 Taiwan, RRID:AB\_437085), IκB-ζ (Cat# 14-16801-82, Invitrogen, RRID:AB\_11218083), p-AKT (9271, CST,  
19 Danvers, MA USA RRID: AB\_329825), total Akt (9272, CST, Danvers, MA USA, AB\_329827), phospho-S6  
20 (2211, CST, Danvers, MA USA, RRID:AB\_331679), total S6 (2217, CST, Danvers, MA USA,  
21 RRID:AB\_331355) and Actin (Cat# A2228, Sigma, St. Louis, MO RRID:AB\_476697). Protein  
22 concentration was determined by BCA assay (23225, Pierce, ThermoFisher, Waltham, MA USA) and  
23 equal amounts of protein were loaded onto SDS-PAGE gel.

24

## 25 **Immunocytochemistry**

26

27 Chondrocytes were plated on sterile, gelatin-coated glass coverslips placed in 24 well plates at lower  
28 concentration. Cells were cultured under normal media conditions and treatments were performed in  
29 the 24 well plate. For staining, media was removed and cells were fixed in 4% formaldehyde in PBS for



1 30 minutes. Cells were washed with PBS containing 0.1% saponin. Cells were blocked using blocking  
2 buffer (1x PBS, 5% NGS, 0.1% saponin) for 1 hour at room temperature. Cells were incubated with anti-  
3 LC3b (12741, CST, Danvers, MA USA RRID:AB\_2617131) or anti-p62 (2C11, Abnova, Taiwan,  
4 RRID:AB\_437085) antibodies at 1:100 concentration in antibody dilution buffer (1x PBS, 1% BSA, 0.1%  
5 saponin) overnight at 4 degrees. Cells were washed with wash buffer (1x PBS, 0.1% saponin) 3 times  
6 and incubated with fluorescent conjugated secondary antibody at 1:1000 in antibody dilution buffer  
7 for 2 hours at room temperature. Samples were washed with wash buffer 3 times. Slides were  
8 coverslipped with antifade mounting media containing DAPI (9071, CST, Danvers, MA USA). Images  
9 were taken on fluorescent microscope.

10

### 11 **Measurement of extracellular lactic acid**

12

13 Chondrocytes were cultured for 1 day with IL-1 $\beta$  treatment (10 ng/mL) with appropriate experimental  
14 conditions in 96 well plates containing 200  $\mu$ l of DMEM containing 10% FBS. Supernatant media was  
15 collected and centrifuged to separate cell debris and floating cells. Supernatant was used immediately  
16 for lactic acid assay to measure secreted lactate in the media using a 1:20 dilution (Cat# 1200011002,  
17 Eton Biosciences, San Diego, CA USA). Unconditioned DMEM with 10% FBS was used as a control for  
18 subtracting background.

19

### 20 **Measurement of gene expression by qPCR**

21 Trizol (Sigma, St. Louis, MO USA) was added to samples to isolate mRNA from cell culture samples.  
22 Chloroform was added at a ratio of 0.2:1 to Trizol to samples, followed by centrifugation at 12,000g for  
23 15 mins. Aqueous layer was isolation and equal amount of 70% ethanol was added. RNA was then  
24 isolated from this fraction using PureLink RNA mini kit (Cat# 12183025, Ambion, Grand Island, NY, USA)  
25 and cDNA was prepared using High Capacity cDNA Reverse Transcription kit (Cat# 4368814, Applied  
26 Biosystems). qPCR was carried out on BioRad CFX96 real time system using iTaq universal SYBR green  
27 super-mix (Cat#1725120, BioRad, Hercules, CA, USA). mRNA expression was normalized using actin as a  
28 housekeeping gene. Full list of primers is listed in Table 1.

## 1 **Measurement of cellular metabolism by Seahorse**

2

3 Primary chondrocytes were plated in Seahorse XF96 plates at 50,000 cells per well and cultured in  
4 media containing glutamine or without glutamine. Cells were then treated with IL-1 $\beta$  (10 ng/mL). After  
5 24 hours, Seahorse assay was performed. For glycolysis stress test, cells were serum starved for 1 hour  
6 in glucose-free media containing treatments, and measurement of ECAR and OCR was performed prior  
7 to and after sequential addition of glucose, oligomycin and 2-DG with measurements performed every  
8 5 minutes. For MitoStress test, cells were incubated in glucose-containing media for 1 hour containing  
9 treatments and measurements were performed every 5 minutes prior to and after sequential addition  
10 of oligomycin, FCCP and Rotenone/Antimycin A. Media for seahorse assays was devoid of glutamine.  
11 Data was analyzed using Wave software.

12

## 13 **Measurement of intracellular ATP**

14

15 Primary chondrocytes were plated in 96 well plates at  $5 \times 10^4$  and treated with IL-1 $\beta$  for 24 hours. Lysates  
16 were collected and processed according to luminescence-based ATP assay kit (Cat#K255, Biovision,  
17 Milpitas, CA USA ADP/ATP ratio Assay kit). Assay was performed in 96 well plate. Luminescence was  
18 measured using luminescent plate reader after 15 minutes. Data was collected and processed using Gen5  
19 software.

20

## 21 **Measurement of ROS**

22

23 Primary chondrocytes were treated for 24 hours in DMEM media. Cells were washed two times with  
24 phenol red-free PBS, followed by incubation with 10  $\mu$ M DCFDA (Cat#D6883, Sigma, St. Louis, MO USA)  
25 in PBS for 30 minutes, followed by two more washes with PBS. Cells were incubated in 37 degrees C  
26 incubator for one hour in PBS, followed by fluorescence measurement using microplate reader using  
27 Ex/Em 495/525 for DCFDA.

28

## 29 **Measurement of metabolite concentrations**

1 The cell suspensions ( $2 \times 10^6$  cells/mL) were prepared by vortexing cell pellets with water. The amino  
2 acids and metabolites listed above were extracted from 50  $\mu$ L of cell suspension with 200  $\mu$ L of  
3 methanol after addition of internal standards (Glu-d3 (1.6  $\mu$ g), Asp-d3 (1.6  $\mu$ g), Asn-d3,15N2 (1.6  $\mu$ g),  
4 Gln-13C5 (1.6  $\mu$ g), alpha-ketoglutarate-d2 (0.4  $\mu$ g), 2-hydroxyglutarate-d3 (0.2  $\mu$ g), oxaloacetate-13C3  
5 (0.2  $\mu$ g), pyruvate-13C3 (2  $\mu$ g), and malate-d3 (0.2  $\mu$ g)). The sample aliquots for alpha-ketoglutarate,  
6 oxaloacetate, and pyruvate were derivatized with o-phenylenediamine to improve mass spectrometric  
7 sensitivity. Quality control (QC) samples were prepared by pooling aliquots of study samples to  
8 monitor instrument performances throughout these analyses.

9 The analysis of Gln, Glu, Asp, and Asn was performed on a Shimadzu 20AD HPLC system and a SIL-20AC  
10 autosampler coupled to 4000Qtrap mass spectrometer (Applied Biosystems) operated in positive  
11 multiple reaction monitoring (MRM) mode. The analysis of 2-hydroxyglutarate and malate was  
12 performed on a Shimadzu 20AD HPLC system and a SIL-20AC autosampler coupled to 4000Qtrap mass  
13 spectrometer (Applied Biosystems) operated in negative MRM mode. The analysis of alpha-  
14 ketoglutarate, oxaloacetate, and pyruvate was performed in positive ion MRM mode on API4000 mass  
15 spectrometer (Applied Biosystems) coupled to a Shimadzu 20AD HPLC system and a SIL-20AC  
16 autosampler. The QC samples were injected every five study samples. Data processing was conducted  
17 with Analyst 1.6.3 (Applied Biosystems).

18

### 19 **Measurement of viability**

20

21 Cells were treated under appropriate conditions. MTT ((3-(4,5-dimethylthiazol-2-yl)-2,5-  
22 diphenyltetrazolium bromide) was dissolved in PBS at 10 mg/mL. MTT was added to wells to a final  
23 concentration of 0.5 mg/mL. Cells were incubated at 37 degrees for 6 hours. Media was removed and  
24 50  $\mu$ L of DMSO was added to each well. Plate was placed on a plate shaker and measurement was  
25 made at 580 nm on microplate reader. Data was collected and processed using Gen5 software.

26

### 27 **Measurement of intracellular glutamate**

28

1 Intracellular glutamate was measured in chondrocytes in 96 well plate format utilizing Glutamate-Glo  
2 assay kit (J7021, Promega, Madison, WI USA). Luminescence was measured on microplate reader. Data  
3 was collected and processed using Gen5 software.

4

### 5 **NF- $\kappa$ B Luciferase Assay**

6

7 Chondrocytes were isolated from sterna of newborn NF- $\kappa$ B-luciferase reporter mice as described  
8 earlier. Cells were cultured and treated appropriately in 96 well plate tissue culture plate. Cells were  
9 washed twice with 1x PBS and lysed using 1x luciferase lysis buffer (L-740, GoldBio, St. Louis, MO USA).  
10 Plates were freeze-thawed in -80 freezer. 20  $\mu$ L of lysates were transferred to white bottom, round  
11 well microplates. Detection was performed after addition of 50  $\mu$ L of detection reagent (I-930, GoldBio,  
12 St. Louis, MO USA). Luminescence was measured by microplate reader. Data was collected and  
13 processed using Gen5 software.

14

### 15 **Statistical Analysis**

16

17 All experiments represent biological replicates and were repeated at least three times, unless otherwise  
18 stated. Technical replicates are considered to be repeat tests of the same value, i.e. testing same samples  
19 in triplicate for qPCR. Biological replicates are considered to be samples derived from separate sources,  
20 such as different mice or on different dates. Statistical analyses were performed using appropriate  
21 statistical test using GraphPad Prism. All graphs were generated using Prism as well. Multiple treatments  
22 were analyzed by One-way ANOVA followed by Tukey's test multiple comparisons test for greater than  
23 2 groups. Student's T test was used for comparing two groups. Student's T test was performed for  
24 comparing same biological samples subject to different treatments. *P* values are indicated where  
25 applicable. \**P*<0.05, \*\**P*<0.01, \*\*\**P*<0.0005, \*\*\*\**P* <.0001. Histology and immunostaining data were  
26 scored by investigators blinded to the experimental conditions. Male and female mice were used at  
27 equal ratios for cell culture to avoid sex bias. Sample size determination was not required.

28

29

30

1 Figures:  
2

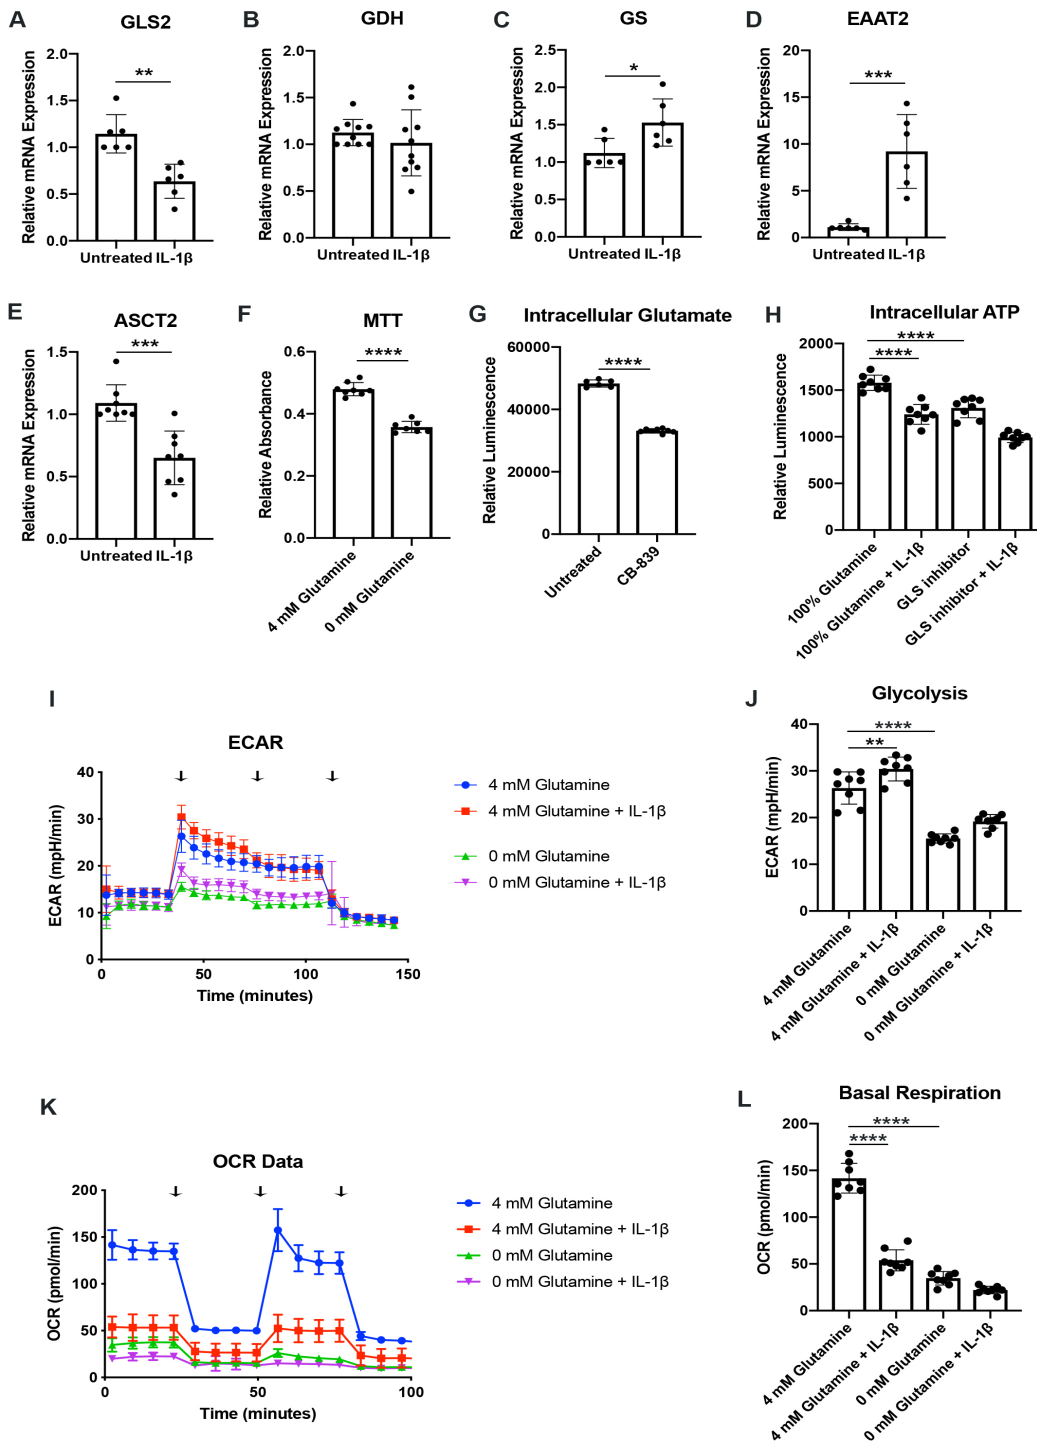

3

4 **Fig 1. Chondrocytes rely upon glutamine for energy production. (A-E)** Primary murine chondrocytes

5 were treated with IL-1 $\beta$  (10 ng/mL) for 24 hours. Gene expression of *Gls2*, *Gdh*, *Gs*, *Eaat2* and *Asct2*

1 were measured by qPCR. Results from n=6 independent biological samples. Unpaired student's T test  
2 was performed. (A: \*\*P=0.0011, B: P=0.375, C: \*P=0.0227, D: \*\*\*P=0.0005, E: \*\*\*P=0.0003) **(F)**  
3 Primary murine chondrocytes were cultured in media with 4 mM glutamine and 0 mM glutamine  
4 under constant glucose conditions. After 24 hours, viability was measured by MTT assay. Results from  
5 n=6 samples from one representative experiment. Unpaired student's T test was performed,  
6 \*\*\*\*P<0.0001. **(G)** Primary murine chondrocytes were treated with CB-839 (1 uM). Intracellular  
7 glutamate was measured by luminescent assay. Unpaired student's T test was performed,  
8 \*\*\*\*P<0.0001. **(H)** Primary murine chondrocytes were treated with CB-839 and/or IL-1 $\beta$  for 24 hours.  
9 Intracellular ATP was measured by luminescent assay. Results from one representative experiment.  
10 One-way ANOVA was performed followed by Tukey's multiple comparisons test. \*\*\*\*P<0.0001 **(I-L)**  
11 Primary sternal chondrocytes were cultured in media containing glutamine or media without glutamine  
12 for 24 hours. Cells were then treated with IL-1 $\beta$  (10 ng/mL) for 24 hours. All values were normalized to  
13 cell viability of treatments relative to untreated cells as measured by MTT assay. **(I-J)** ECAR  
14 measurement in glycolysis stress test (Injection 1: No treatment, Injection 2: Glucose, Injection 3:  
15 Oligomycin, Injection 4: 2-DG) or **(K-L)** OCR measurement in MitoStress test (Injection 1: No treatment,  
16 Injection 2: Oligomycin, Injection 3: FCCP, Injection 4: Antimycin A/Rotenone) was performed on  
17 Seahorse Instrument. Measurements were performed every 6 minutes with 8 replicates per timepoint  
18 for each condition. Arrows represent injections timepoints. Graphs shown in Fig 1J and 1L are from a  
19 single timepoint. One-way ANOVA was performed followed by Tukey's multiple comparisons test.  
20 J:\*\*P=0.0077, \*\*\*\*P<0.0001, L:\*\*\*\*P<0.0001.  
21

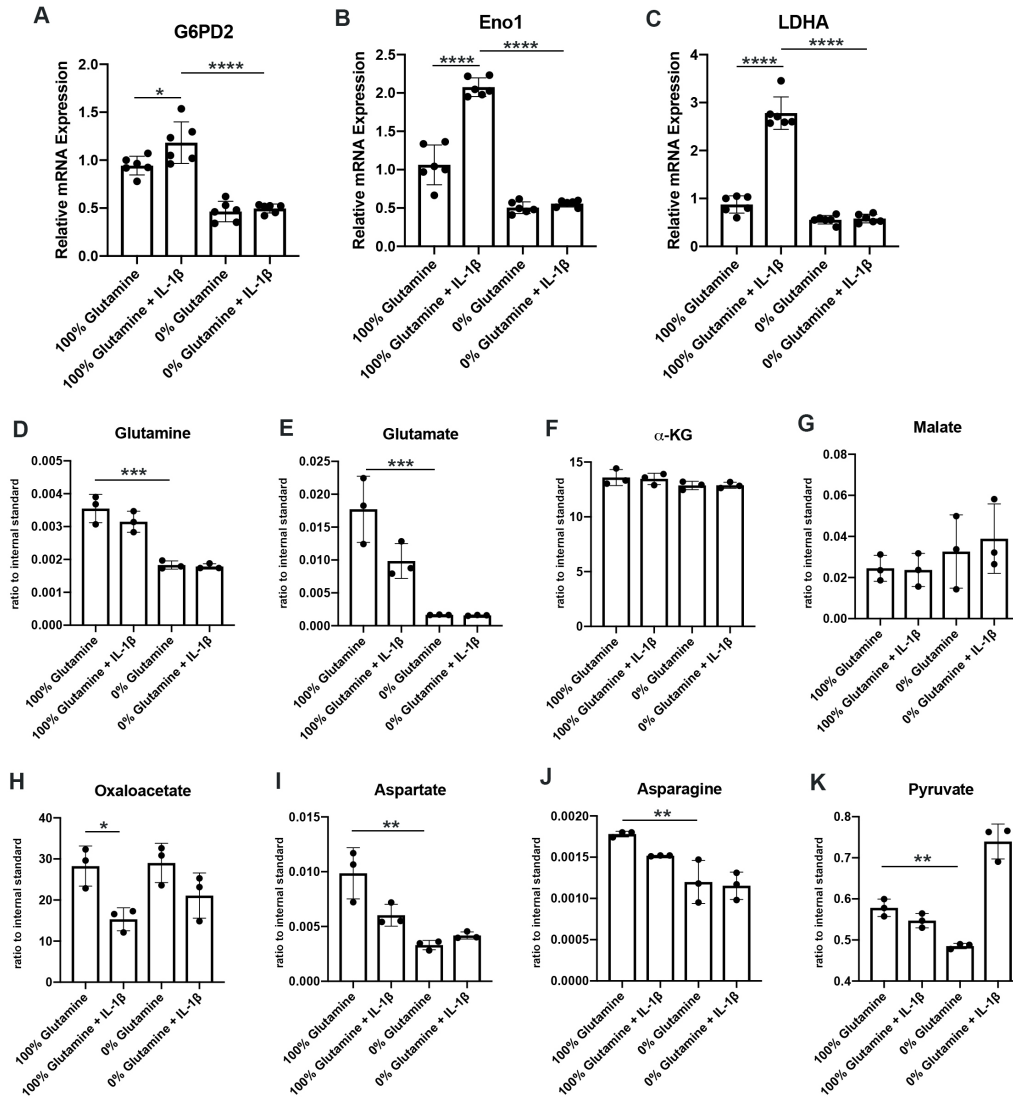

1

2 **Fig 2. Glutamine deprivation causes metabolic reprogramming to inhibit glycolysis. (A-C)** Primary  
 3 murine chondrocytes were cultured in media containing 100% glutamine or 0% glutamine for 24 hours.  
 4 Cells were then treated with IL-1 $\beta$  (10 ng/mL) for 24 hours. Gene expression of *G6pd2*, *Eno1* and *Ldha*  
 5 were measured by qPCR from n=6 replicates. One-way ANOVA was performed followed by Tukey's  
 6 multiple comparisons test. A: \*P=0.0242, \*\*\*\*P<0.0001, B: \*\*\*\*P<0.0001, C: \*\*\*\*P<0.0001 **(D-K)**  
 7 Under similar conditions, metabolite levels were measured by LC-MS with n=3 replicates. One-way  
 8 ANOVA was performed followed by Tukey's multiple comparisons test. D: \*\*\*P=0.0003,  
 9 E:\*\*\*P=0.0006, F: P>0.05, G: P>0.05, H:\*P=0.036, I: \*\*P=0.0012, J:\*\*P=0.0079, K: \*\*P=0.009.

10

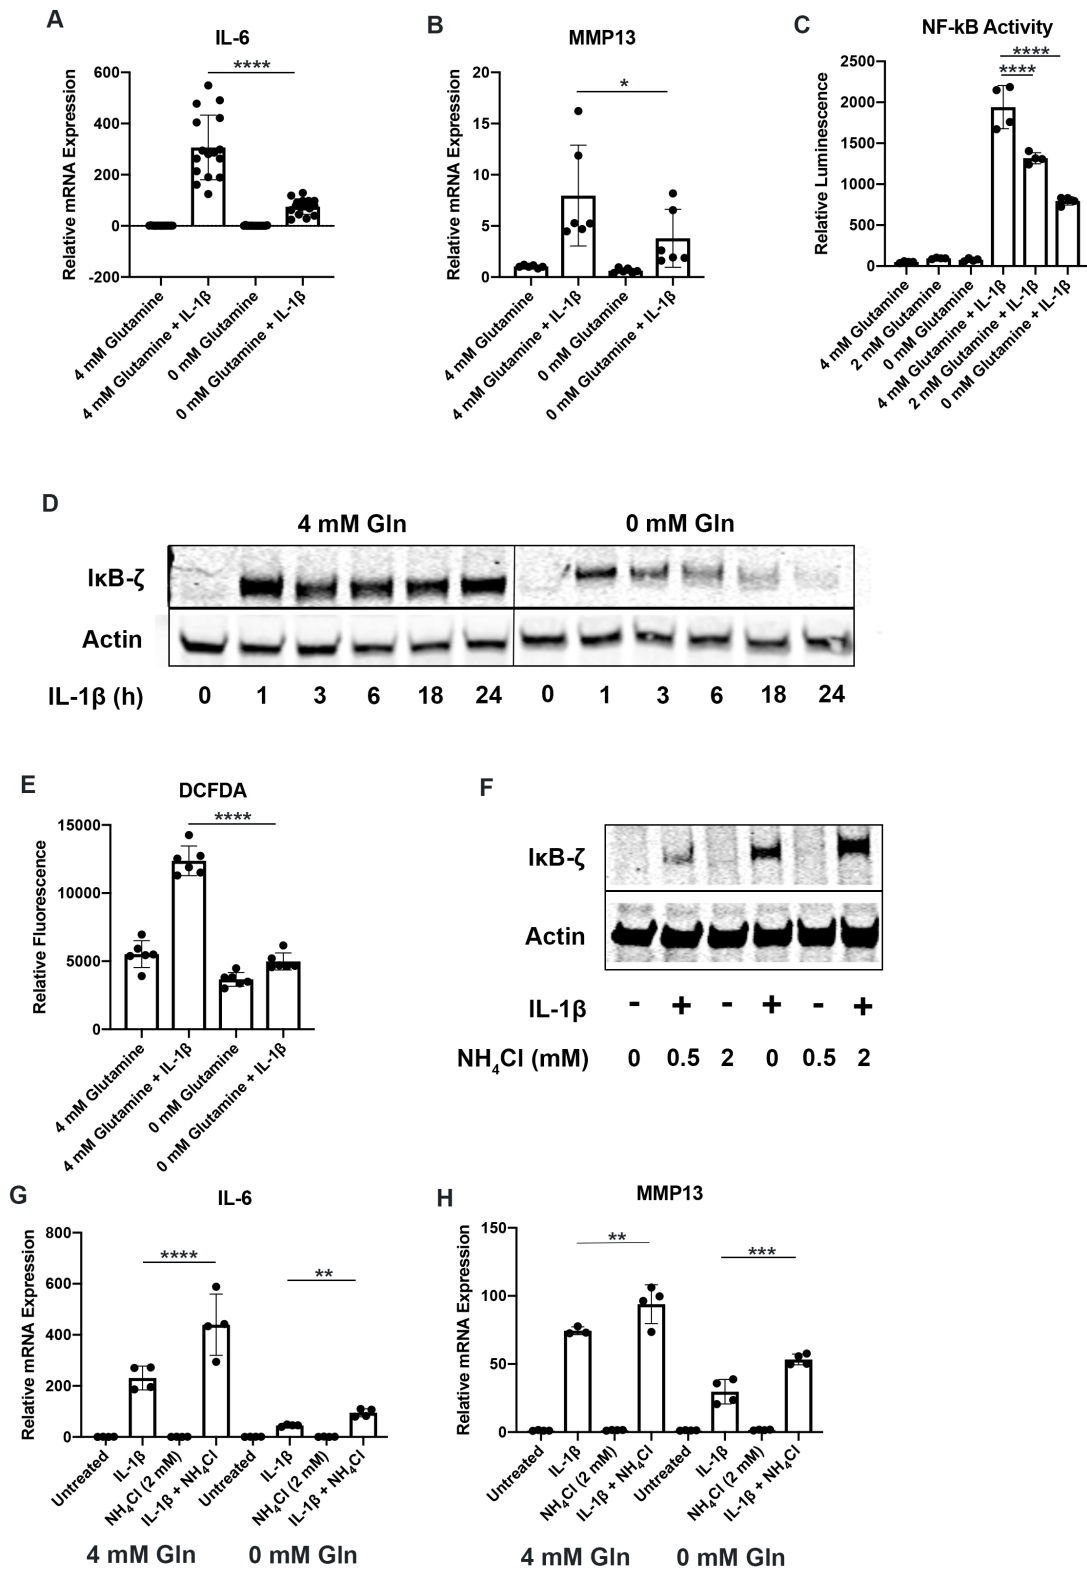

1

2 **Fig 3. Glutamine deprivation inhibits the inflammatory response. (A-B)** Primary murine chondrocytes

3 were cultured in media containing 100% glutamine or 0% glutamine for 24 hours. Cells were then



1 treated with IL-1 $\beta$  (10 ng/mL) for 24 hours. Gene expression of *Il6* and *Mmp13* were measured by  
2 qPCR. One-way ANOVA was performed followed by Tukey's multiple comparisons test.  
3 A:\*\*\*\*P<0.0001, B: \*P=0.0489 **(C)** Primary murine chondrocytes were isolated from NF- $\kappa$ B-luciferase  
4 reporter mice. Chondrocytes were then cultured in media containing 4 mM, 2 mM or 0 mM glutamine  
5 for 24 hours. Cells were then treated with IL-1 $\beta$  for 24 hours. NF- $\kappa$ B activity was measured by luciferase  
6 assay. One-way ANOVA was performed followed by Tukey's multiple comparisons test. \*\*\*\*P<0.0001.  
7 **(D)** Primary murine chondrocytes were cultured in media containing 100% glutamine or 0% glutamine  
8 for 24 hours. Cells were treated with IL-1 $\beta$  for the indicated timepoints. I $\kappa$ B- $\zeta$  protein was measured by  
9 immunoblotting, with actin used as housekeeping. Image displays representative experiment. **(E)**  
10 Primary murine chondrocytes were cultured in media containing 100% glutamine or 0% glutamine for  
11 24 hours. Cells were then treated with IL-1 $\beta$  (10 ng/mL) for 24 hours. ROS levels were measured by  
12 DCFDA assay using microplate reader. One-way ANOVA was performed followed by Tukey's multiple  
13 comparisons test. \*\*\*\*P<0.0001. **(F)** Primary chondrocytes were cultured in media containing  
14 glutamine and supplemented with ammonium chloride at the indicated concentrations for 24 hours in  
15 the presence of IL-1 $\beta$ . I $\kappa$ B- $\zeta$  protein was measured by immunoblotting. **(G-H)** Primary chondrocytes  
16 were cultured in media containing 4 mM or 0 mM glutamine for 6 hours. Cells were then  
17 supplemented with or without 2 mM ammonium chloride. IL-1 $\beta$  stimulation was performed for 24  
18 hours. Gene expression of *Il6* and *Mmp13* was measured by qPCR. One-way ANOVA was performed  
19 followed by Tukey's multiple comparisons test. G: \*\*\*\*P<0.0001, \*\*P=0.0065, H: \*\*P=, \*\*\*\*P= 0.0096,  
20 0.0005.  
21

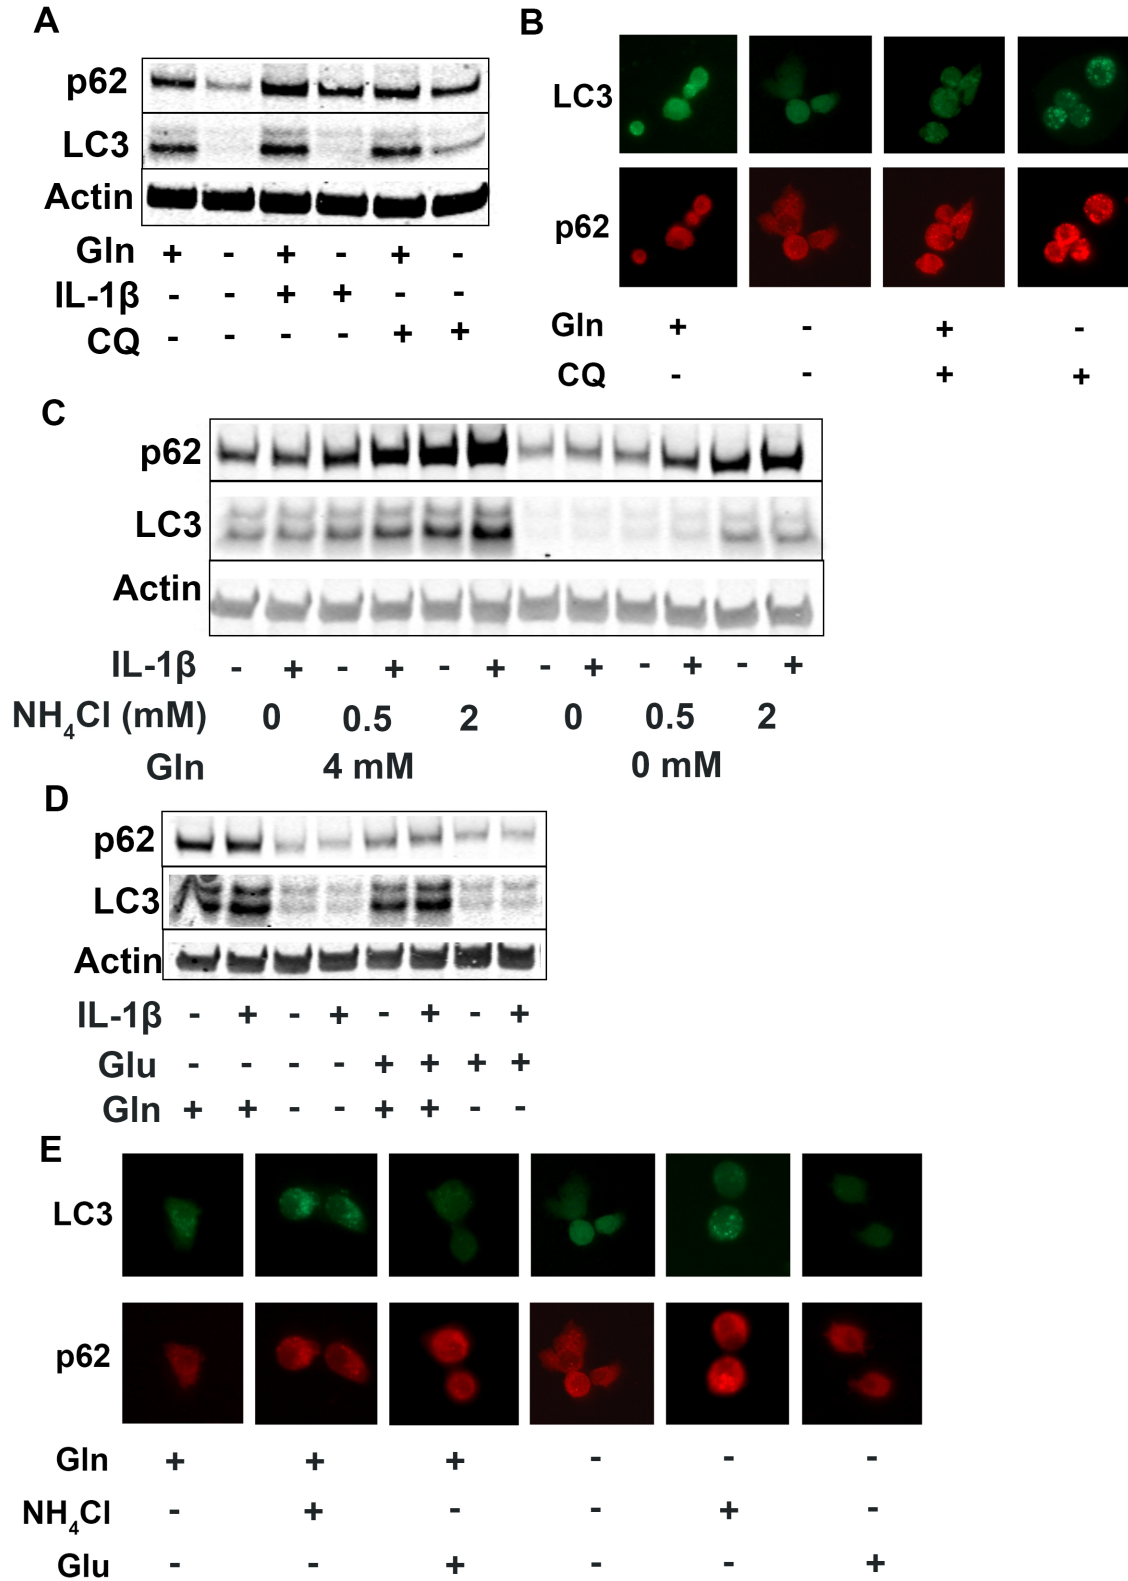

1

2 **Fig 4. Glutamine deprivation promotes autophagy and ammonia inhibits autophagy. (A)** Primary

3 murine chondrocytes were cultured in media containing 100% glutamine or 0% glutamine for 24 hours.

1 Cells were then treated with IL-1 $\beta$  (10 ng/mL) in the presence or absence of chloroquine (10  $\mu$ M) for 24  
2 hours. Protein expression of p62 and LC3-II were measured by immunoblotting. **(B)** Primary murine  
3 chondrocytes were plated on coated cover slips cultured in glutamine containing or glutamine free  
4 media for 12 hours. Cells were treated with chloroquine (10  $\mu$ M) for 6 hours. Cells were fixed with 4%  
5 formaldehyde in PBS and immunofluorescence (IF) was performed for LC3B and p62. Cells were  
6 mounted on slides and imaged with representative images displayed. **(C)** Primary chondrocytes were  
7 cultured in media containing 4 mM or 0 mM glutamine. Cells were supplemented with ammonium  
8 chloride at the indicated concentrations. After 6 hours, cells were treated with IL-1 $\beta$  (10 ng/mL) for 24  
9 hours. Immunoblotting was performed for p62 and LC3B to display autophagosome processing. Image  
10 displays representative experiment. **(D)** Primary chondrocytes were cultured in media containing 4 mM  
11 or 0 mM glutamine. Cells were supplemented with glutamate (200  $\mu$ M). After 6 hours, cells were  
12 treated with IL-1 $\beta$  (10 ng/mL) for 24 hours. Immunoblotting was performed for p62 and LC3b. Image  
13 displays representative experiment. **(E)** Primary murine chondrocytes were plated on coated cover  
14 slips cultured in glutamine containing or glutamine free media for 12 hours. Cells were supplemented  
15 with ammonium chloride (2 mM) or glutamate (200  $\mu$ M). Cells were fixed with 4% formaldehyde and IF  
16 was performed for LC3B and p62. Cells were mounted on slides and imaged with representative  
17 images to display autophagosome punctate.

18

**A**

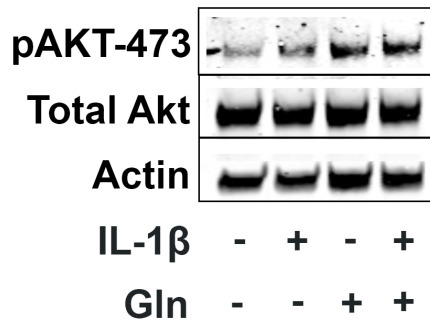

**B**

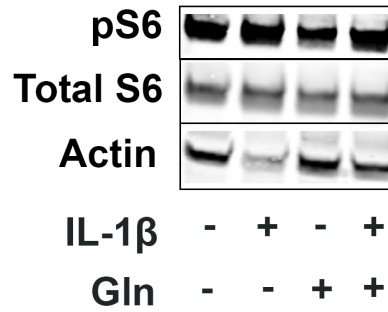

**C**

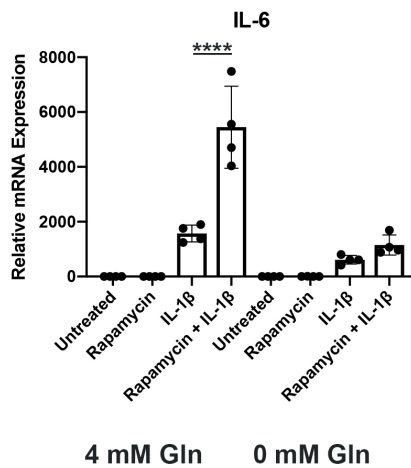

**D**

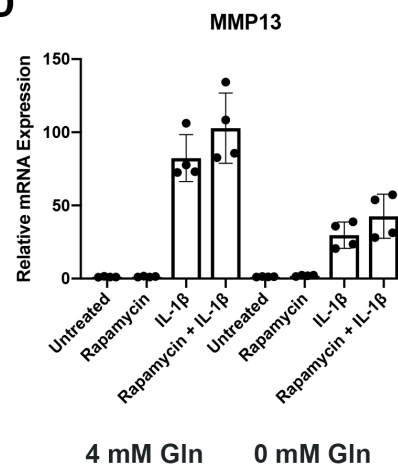

1

2 **Fig 5. Glutamine deprivation modulates mTOR activation.** (A) Primary murine chondrocytes were  
 3 cultured in media containing 100% glutamine or 0% glutamine for 24 hours. Cells were then treated  
 4 with IL-1β (10 ng/mL). After 24 hours, lysates were collected and immunoblotting was performed for  
 5 pAKT and total Akt. (B) Under similar conditions, immunoblotting was performed for pS6 and total S6.  
 6 (C-D) Primary murine chondrocytes were cultured in media containing 100% glutamine or 0%  
 7 glutamine for 24 hours. Cells were then treated with IL-1β (10 ng/mL) in the presence or absence of  
 8 rapamycin 50 nM for 24 hours. Gene expression of *Il6* and *Mmp13* was measured by qPCR. Results  
 9 from one representative experiment. One-way ANOVA was performed followed by Tukey's multiple  
 10 comparisons test. C:\*\*\*\*P<0.0001.

11

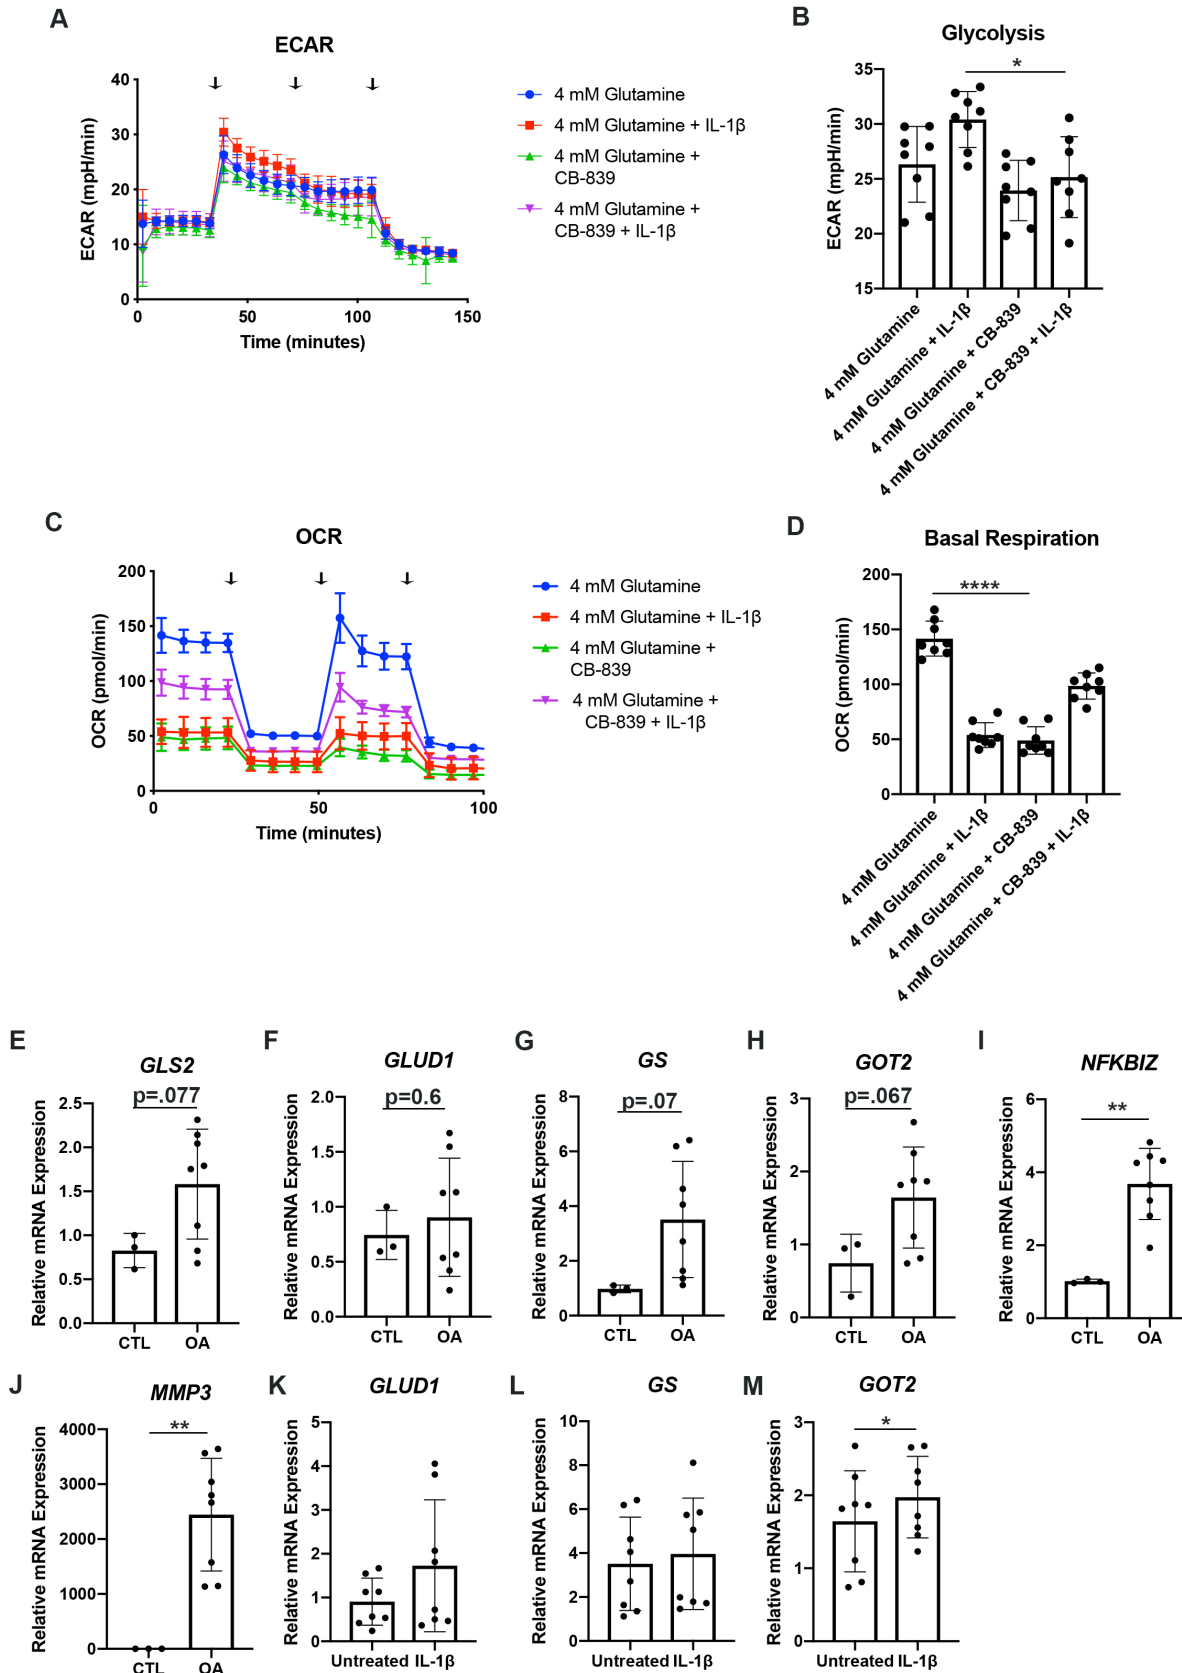

1 **Figure 1 Supplement 1. (A-D)** Primary sternal chondrocytes were cultured in media containing  
2 glutamine with or without CB-839 (1 mM). Cells were then treated with IL-1 $\beta$  (10 ng/mL) for 24 hours.  
3 All values were normalized to cell viability of treatments relative to untreated cells as measured by  
4 MTT assay. **(A-B)** ECAR measurement in glycolysis stress test (Injection 1: No treatment, Injection 2:  
5 Glucose, Injection 3: Oligomycin, Injection 4: 2-DG) or **(C-D)** OCR measurement in MitoStress test  
6 (Injection 1: No treatment, Injection 2: Oligomycin, Injection 3: FCCP, Injection 4: Antimycin  
7 A/Rotenone) was performed on Seahorse Instrument. Measurements were performed every 6 minutes  
8 with 8 replicates per timepoint for each condition. Arrows represent injection timepoints. Graphs  
9 shown in Fig S1B and S1D are from a single timepoint. One-way ANOVA was performed followed by  
10 Tukey's multiple comparisons test. B: \*P= 0.012, D: \*\*\*\*P<0.0001. **(E-J)** Human chondrocytes were  
11 isolated from OA cartilage or healthy cartilage isolated from patients. Gene expression was measured  
12 by qPCR. **(K-M)** Human chondrocytes were isolated from knee cartilage and cultured in media. Cells  
13 were treated with IL-1 $\beta$  for 24 hours. Gene expression was measured by qPCR from n=8 biological  
14 samples. Unpaired student's T test was performed. I:\*\*P=0.0013, J:\*\*P=0.0032, M:\*P=0.05.  
15

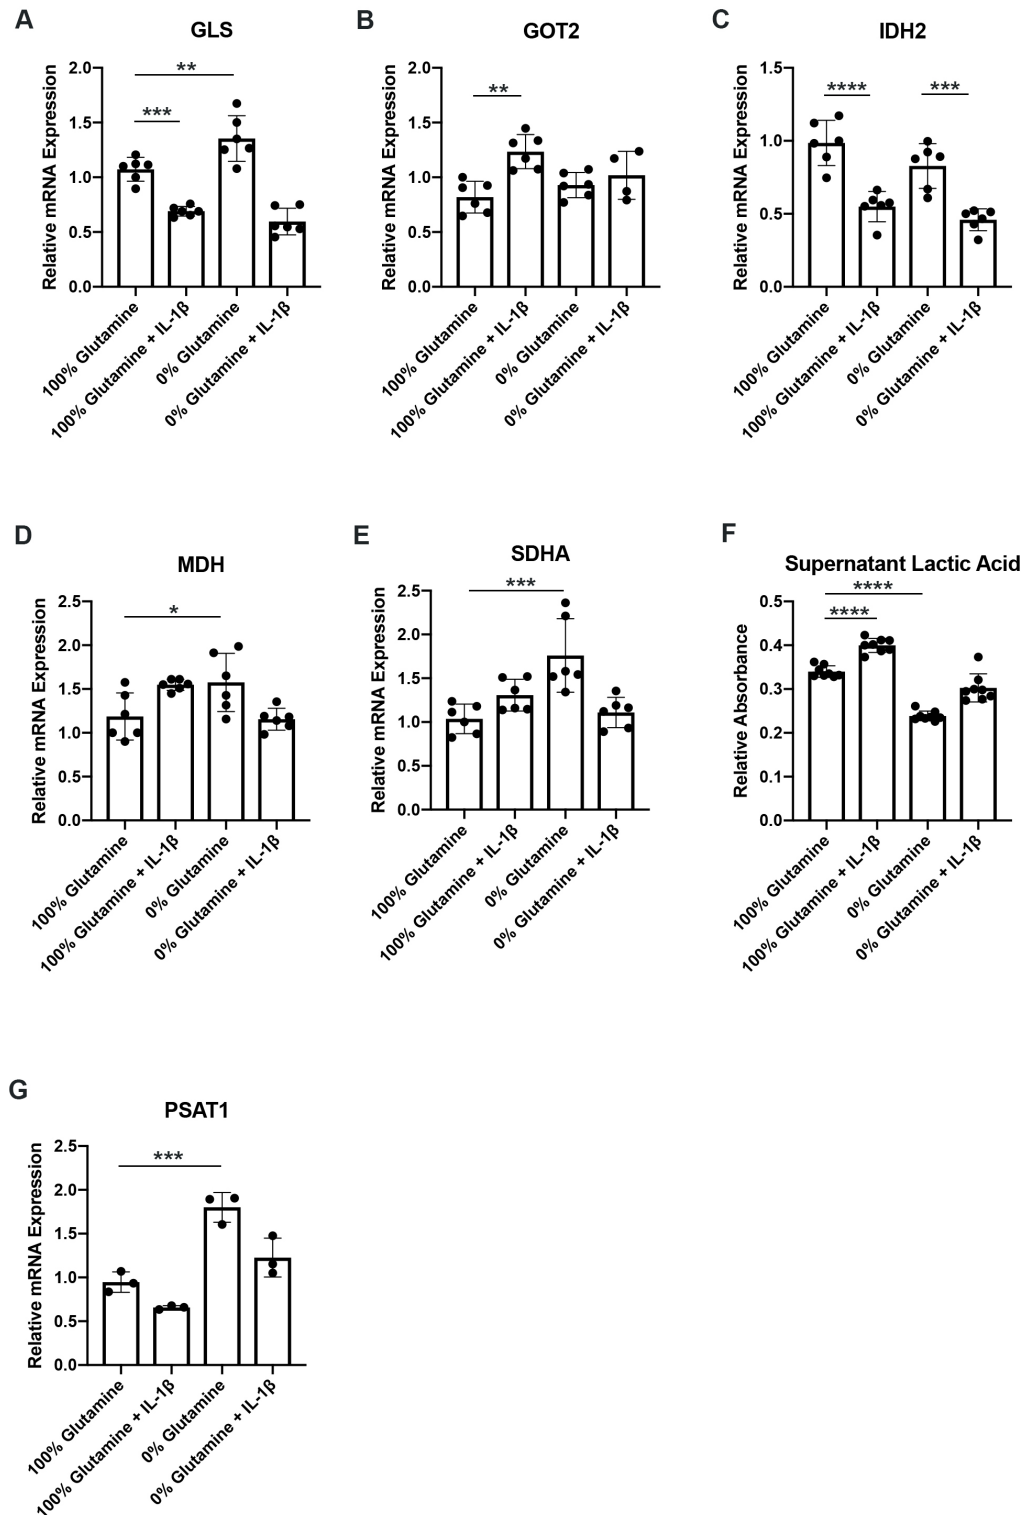

1

2 **Figure 2 Supplement 2. (A-E)** Primary murine chondrocytes were cultured in media containing 100%  
3 glutamine or 0% glutamine for 24 hours. Cells were then treated with IL-1 $\beta$  (10 ng/mL) for 24 hours.  
4 Gene expression of *Gls*, *Got2*, *Idh2*, *Mdh*, and *Sdha* were measured by qPCR from n=6 replicates. One-

1 way ANOVA was performed followed by Tukey's multiple comparisons test. A: \*\*P=0.0085,  
2 \*\*\*P<0.0004, B:\*\*P=0.0011, C: \*\*\*\*P<0.0001, \*\*\*P=0.0003, D:\*P=0.036, E:\*\*\*P=0.0005. **(F)** Under  
3 similar conditions, supernatant was collected and lactic acid was measured. One-way ANOVA was  
4 performed followed by Tukey's multiple comparisons test. \*\*\*\*P<0.0001. **(G)** Gene expression of  
5 *Psat1* was measured under similar conditions by qPCR. One-way ANOVA was performed followed by  
6 Tukey's multiple comparisons test. \*\*\*P=0.0006.

7



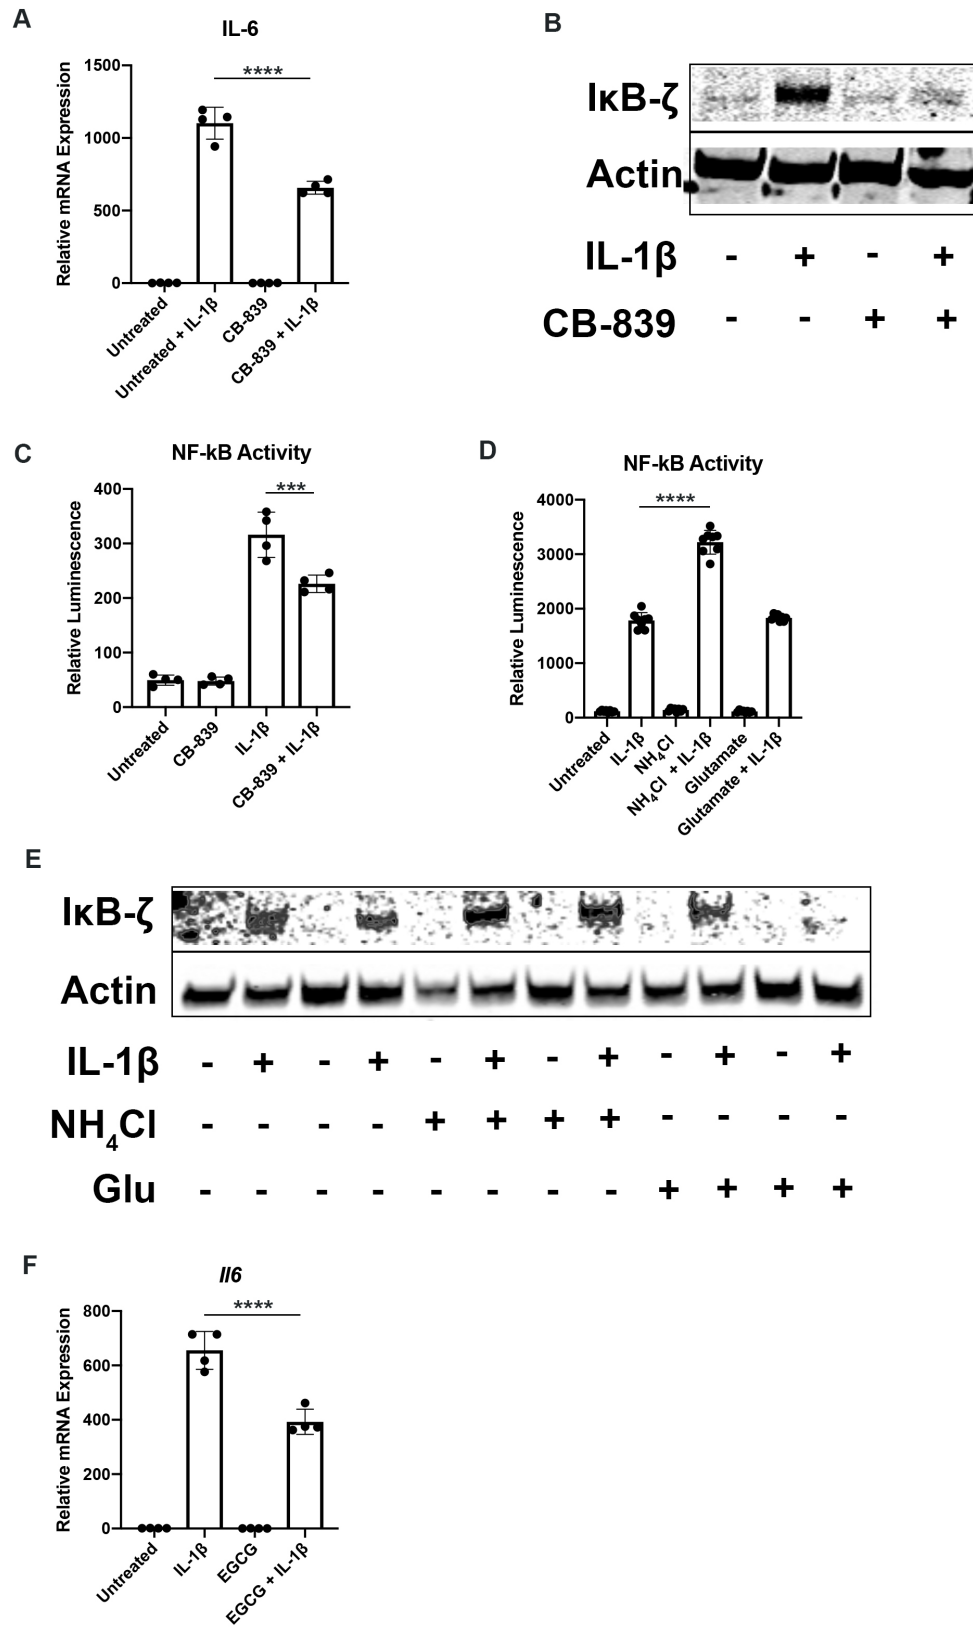

1 **Figure 3 Supplement 3. (A)** Primary murine chondrocytes were treated with IL-1 $\beta$  in the presence or  
2 absence of CB-839 (1 mM) for 24 hours. Gene expression of *Il6* was measured by qPCR. Results are  
3 representative of one experiment. One-way ANOVA was performed followed by Tukey's multiple  
4 comparisons test. \*\*\*\*P<0.0001. **(B)** Under similar conditions, I $\kappa$ B- $\zeta$  protein levels were measured by  
5 immunoblotting. **(C)** Primary NF- $\kappa$ B-luciferase reporter chondrocytes were treated with IL-1 $\beta$  in the  
6 presence or absence of CB-839 (1 mM) for 24 hours. NF- $\kappa$ B activity was measured by luciferase assay.  
7 One-way ANOVA was performed followed by Tukey's multiple comparisons test. \*\*\*P=0.0007 **(D)**  
8 Primary NF- $\kappa$ B-luciferase reporter chondrocytes were treated with IL-1 $\beta$  in the presence or absence of  
9 ammonium chloride (2 mM) or glutamate (200  $\mu$ M). NF- $\kappa$ B activity was measured by luminescent  
10 luciferase assay. One-way ANOVA was performed followed by Tukey's multiple comparisons test.  
11 \*\*\*\*P<0.0001. **(E)** Under similar conditions, lysates were collected and I $\kappa$ B- $\zeta$  protein levels were  
12 measured by immunoblotting. Image from representative experiment. **(F)** Chondrocytes were treated  
13 with IL-1 $\beta$  in the presence or absence of ECGC for 24 hours. Gene expression of *Il6* was measured by  
14 qPCR. Results are representative of one experiment. One-way ANOVA was performed followed by  
15 Tukey's multiple comparisons test. \*\*\*\*P<0.0001.  
16

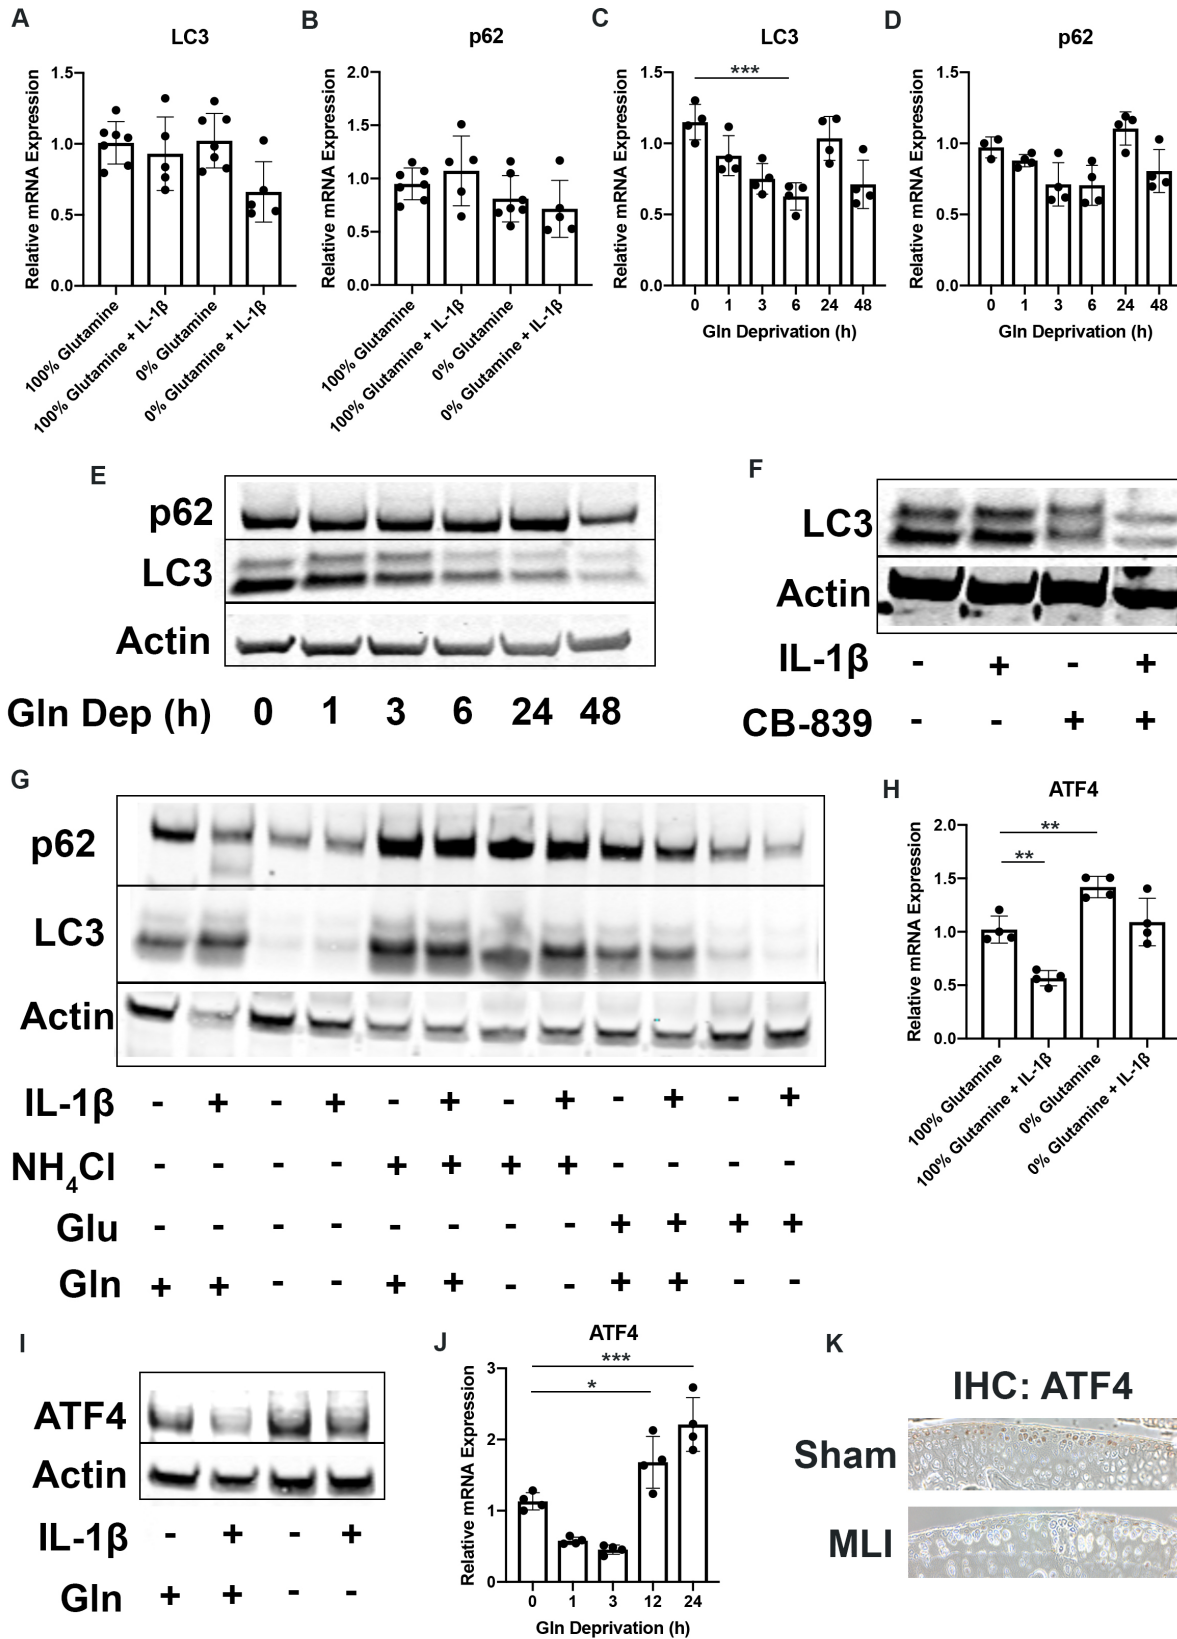

1 **Figure 4 Supplement 4. (A-B)** Primary murine chondrocytes were cultured in media containing 100%  
2 glutamine or 0% glutamine for 24 hours. Cells were then treated with IL-1 $\beta$  (10 ng/mL) for 24 hours.  
3 Gene expression of *Lc3* and *p62* was measured by qPCR. Results from 5-6 biological replicates. One-  
4 way ANOVA was performed followed by Tukey's multiple comparisons test. **(C-D)** Chondrocytes were  
5 plated in glutamine-free media for different amounts of time. Gene expression of *Lc3* and *p62* was  
6 measured by qPCR. One-way ANOVA was performed followed by Tukey's multiple comparisons test.  
7 \*\*\*P=0.0004. **(E)** Under similar conditions, immunoblotting was performed for LC3 and p62. **(F)**  
8 Chondrocytes were treated with IL-1 $\beta$  in the presence or absence of CB-839 for 24 hours.  
9 Immunoblotting was performed for LC3. **(G)** Primary chondrocytes were cultured in media containing 4  
10 mM or 0 mM glutamine. Cells were supplemented with ammonium chloride (2 mM) or glutamate (200  
11  $\mu$ M). After 6 hours, cells were treated with IL-1 $\beta$  (10 ng/mL) for 24 hours. Immunoblotting was  
12 performed for p62 and LC3B. Image displays representative experiment. **(H)** Primary murine  
13 chondrocytes were cultured in media containing 100% glutamine or 0% glutamine for 24 hours. Cells  
14 were then treated with IL-1 $\beta$  (10 ng/mL) for 24 hours. Gene expression of *Atf4* was measured by qPCR.  
15 Results from n=4 replicates. One-way ANOVA was performed followed by Tukey's multiple  
16 comparisons test. \*\*P=0.0033, \*P=0.0088. **(I)** Immunoblotting was performed under similar  
17 conditions for ATF4. **(J)** Chondrocytes were plated in glutamine-free media for different amounts of  
18 time. Gene expression of *Atf4* was measured by qPCR. One-way ANOVA was performed followed by  
19 Tukey's multiple comparisons test. \*P=0.0419, \*\*\*P=0.0001. **(K)** MLI surgery was performed on 12  
20 week old mice to induce OA with sham surgery performed on contralateral leg. After 2 weeks, knee  
21 joints were collected and sectioned. IHC was performed for ATF4 which is display as brown stain, with  
22 representative image displayed.

23

A

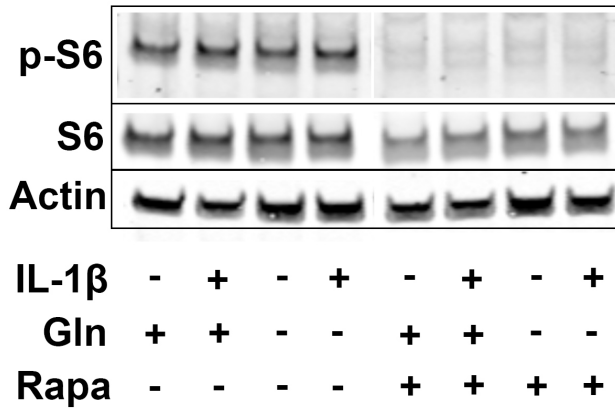

B

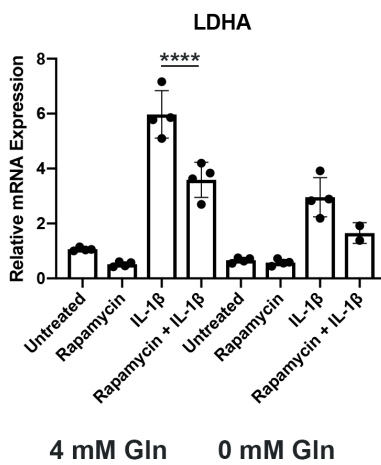

C

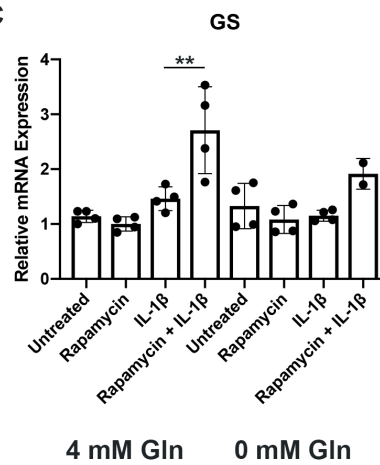

D

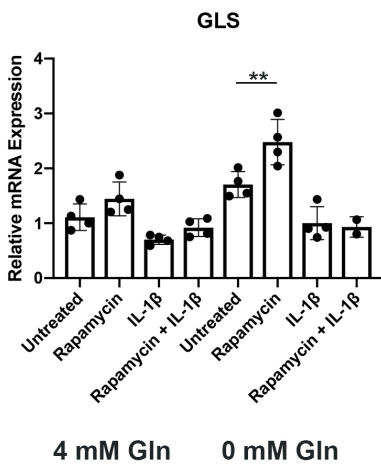

E

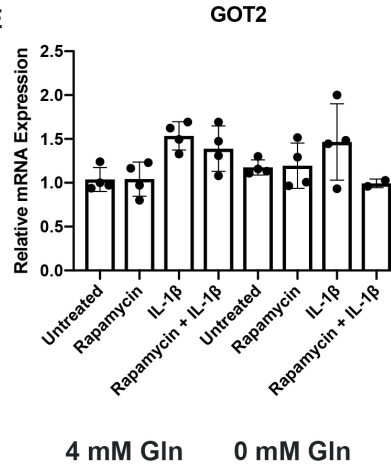

1

4 mM Gln 0 mM Gln

4 mM Gln 0 mM Gln

2

**Figure 5 Supplement 5. (A)** Primary murine chondrocytes were cultured in media containing 100%

3

glutamine or 0% glutamine for 24 hours. Cells were then treated with IL-1 $\beta$  (10 ng/mL) for 24 hours in

4

the presence or absence of rapamycin (50 nM). Immunoblotting was performed for pS6 and total S6.

1 **(B-E)** Under similar conditions, gene expression was measured by qPCR. One-way ANOVA was  
2 performed followed by Tukey's multiple comparisons test. B:\*\*\*\*P<0.0001, C: \*\*P=0.0017,  
3 D:\*\*P=0.0088.

4

5

6 **Table 1: List of primers:**

| Primer  | Sequence (5' → 3')                                     |
|---------|--------------------------------------------------------|
| m-Ilf6  | GCTACCAAACCTGGATATAATCAGGA<br>CCAGGTAGCTATGGTACTCCAGAA |
| m-Mmp13 | GCCAGAACTTCCCAACCAT<br>TCAGAGCCCAGAATTTTCTCC           |
| m-Atf4  | TCGATGCTCTGTTTCGAATG<br>AGAATGTAAAGGGGGCAACC           |
| m-Lc3   | TGGGACCAGAACTTGGTCT<br>GACCAGCACCCCAGTAAGAT            |
| m-p62   | AGAATGTGGGGGAGAGTGTG<br>TCTGGGGTAGTGGGTGTCAG           |
| m-GLS   | CTACAGGATTGCGAACATCTGAT<br>ACACCATCTGACGTTGTCTGA       |
| m-GDH   | GGCCGATTGACCTTCAAATA<br>TCCTGTCCTGGAACCTCTGCT          |
| m-GS    | CATTGACAAACTGAGCAAGAGG<br>AAGTCGTTGATGTTGGAGGTT        |
| m-EAAT2 | GGCAATCCCAAACCTCAAGAA<br>GTGCTATTGGCCTCCTCAGA          |
| m-ASCT2 | CAACCAAAGAGGTGCTGGAT<br>CCTCCACCTCACAGAGAAGC           |
| m-G6pd2 | CTGAATGAACGCAAAGCTGA<br>CAATCTTGTGCAGCAGTGGT           |
| m-Eno1  | GCCTCCTGCTCAAAGTCAAC<br>AACGATGAGACACCATGACG           |

|          |                          |
|----------|--------------------------|
| m-Ldha   | TGGAAGACAAACTCAAGGGCGAGA |
|          | TGACCAGCTTGGAGTTCGCAGTTA |
| m-Mdh    | GGTGCAGCCTTAGATAAATACGC  |
|          | AGTCAAGCAACTGAAGTTCTCC   |
| m-Sdha   | AACACTGGAGGAAGCACACC     |
|          | AGTAGGAGCGGATAGCAGGA     |
| m-Idh2   | AACCGTGACCAGACTGATGAC    |
|          | ATGGTGGCACACTTGACAGC     |
| m-Got2   | GATCCGTCCCCTGTATTCCA     |
|          | CACCTCTTGCAACCATTGCTT    |
| h-GLS2   | TCTCTTCCGAAAGTGTGTGAGC   |
|          | CCGTGAACTCCTCAAATCAGG    |
| h-GLUD1  | TATCCGGTACAGCACTGACG     |
|          | GCTCCATGGTGAATCTTCGT     |
| h-GS     | CCTGCTTGTATGCTGGAGTC     |
|          | GATCTCCCATGCTGATTCCT     |
| h-GOT2   | GTTTGCCTCTGCCAATCATATG   |
|          | GAGGGTTGGAATACATGGGAC    |
| h-NFKBIZ | CCGTTTCCCTGAACACAGTT     |
|          | AGAAAAGACCTGCCCTCCAT     |
| h-MMP3   | CTGGACTCCGACACTCTGGA     |
|          | CAGGAAAGGTTCTGAACTGACC   |
| h-ATF4   | TCTCCAGCGACAAGGCTAA      |
|          | CAATCTGTCCCGGAGAAGG      |

1  
2  
3  
4  
5  
6  
7

## 1 References:

- 2 Abboud, G., Choi, S. C., Kanda, N., Zeumer-Spataro, L., Roopenian, D. C., & Morel, L. (2018). Inhibition  
3 of Glycolysis Reduces Disease Severity in an Autoimmune Model of Rheumatoid Arthritis. *Front*  
4 *Immunol*, *9*, 1973. doi:10.3389/fimmu.2018.01973
- 5 Adapala, N. S., Swarnkar, G., Arra, M., Shen, J., Mbalaviele, G., Ke, K., & Abu-Amer, Y. (2020).  
6 Inflammatory osteolysis is regulated by site-specific ISGylation of the scaffold protein NEMO.  
7 *Elife*, *9*. doi:10.7554/eLife.56095
- 8 Akhbari, P., Karamchandani, U., Jaggard, M. K. J., Graca, G., Bhattacharya, R., Lindon, J. C., . . . Gupte, C.  
9 M. (2020). Can joint fluid metabolic profiling (or "metabonomics") reveal biomarkers for  
10 osteoarthritis and inflammatory joint disease?: A systematic review. *Bone Joint Res*, *9*(3), 108-  
11 119. doi:10.1302/2046-3758.93.BJR-2019-0167.R1
- 12 Allen, K. D., Thoma, L. M., & Golightly, Y. M. (2022). Epidemiology of osteoarthritis. *Osteoarthritis*  
13 *Cartilage*, *30*(2), 184-195. doi:10.1016/j.joca.2021.04.020
- 14 Aman, Y., Schmauck-Medina, T., Hansen, M., Morimoto, R. I., Simon, A. K., Bjedov, I., . . . Fang, E. F.  
15 (2021). Autophagy in healthy aging and disease. *Nat Aging*, *1*(8), 634-650. doi:10.1038/s43587-  
16 021-00098-4
- 17 Anderson, J. R., Chokesuwattanaskul, S., Phelan, M. M., Welting, T. J. M., Lian, L. Y., Peffers, M. J., &  
18 Wright, H. L. (2018). (1)H NMR Metabolomics Identifies Underlying Inflammatory Pathology in  
19 Osteoarthritis and Rheumatoid Arthritis Synovial Joints. *J Proteome Res*, *17*(11), 3780-3790.  
20 doi:10.1021/acs.jproteome.8b00455
- 21 Arra, M., Swarnkar, G., Alippe, Y., Mbalaviele, G., & Abu-Amer, Y. (2022). IkappaB-zeta signaling  
22 promotes chondrocyte inflammatory phenotype, senescence, and erosive joint pathology. *Bone*  
23 *Res*, *10*(1), 12. doi:10.1038/s41413-021-00183-9
- 24 Arra, M., Swarnkar, G., Ke, K., Otero, J. E., Ying, J., Duan, X., . . . Abu-Amer, Y. (2020). LDHA-mediated  
25 ROS generation in chondrocytes is a potential therapeutic target for osteoarthritis. *Nat*  
26 *Commun*, *11*(1), 3427. doi:10.1038/s41467-020-17242-0
- 27 B'Chir, W., Maurin, A. C., Carraro, V., Averous, J., Jousse, C., Muranishi, Y., . . . Bruhat, A. (2013). The  
28 eIF2alpha/ATF4 pathway is essential for stress-induced autophagy gene expression. *Nucleic*  
29 *Acids Res*, *41*(16), 7683-7699. doi:10.1093/nar/gkt563
- 30 Baudart, P., Louati, K., Marcelli, C., Berenbaum, F., & Sellam, J. (2017). Association between  
31 osteoarthritis and dyslipidaemia: a systematic literature review and meta-analysis. *RMD Open*,  
32 *3*(2), e000442. doi:10.1136/rmdopen-2017-000442
- 33 Blasioli, D. J., & Kaplan, D. L. (2014). The roles of catabolic factors in the development of osteoarthritis.  
34 *Tissue Eng Part B Rev*, *20*(4), 355-363. doi:10.1089/ten.TEB.2013.0377
- 35 Catheline, S. E., Bell, R. D., Oluoch, L. S., James, M. N., Escalera-Rivera, K., Maynard, R. D., . . . Jonason,  
36 J. H. (2021). IKKbeta-NF-kappaB signaling in adult chondrocytes promotes the onset of age-  
37 related osteoarthritis in mice. *Sci Signal*, *14*(701), eabf3535. doi:10.1126/scisignal.abf3535
- 38 Chiellini, G. (2020). Metabolic Reprogramming in Health and Disease. *Int J Mol Sci*, *21*(8).  
39 doi:10.3390/ijms21082768
- 40 Choi, M. C., Jo, J., Park, J., Kang, H. K., & Park, Y. (2019). NF-kappaB Signaling Pathways in Osteoarthritic  
41 Cartilage Destruction. *Cells*, *8*(7). doi:10.3390/cells8070734



- 1 Choi, M. C., Maruyama, T., Chun, C. H., & Park, Y. (2018). Alleviation of Murine Osteoarthritis by  
2 Cartilage-Specific Deletion of IkappaBzeta. *Arthritis Rheumatol*, *70*(9), 1440-1449.  
3 doi:10.1002/art.40514
- 4 Coleman, M. C., Goetz, J. E., Brouillette, M. J., Seol, D., Willey, M. C., Petersen, E. B., . . . Martin, J. A.  
5 (2018). Targeting mitochondrial responses to intra-articular fracture to prevent posttraumatic  
6 osteoarthritis. *Sci Transl Med*, *10*(427). doi:10.1126/scitranslmed.aan5372
- 7 Cruzat, V., Macedo Rogero, M., Noel Keane, K., Curi, R., & Newsholme, P. (2018). Glutamine:  
8 Metabolism and Immune Function, Supplementation and Clinical Translation. *Nutrients*, *10*(11).  
9 doi:10.3390/nu10111564
- 10 Deveza, L. A., & Loeser, R. F. (2018). Is osteoarthritis one disease or a collection of many?  
11 *Rheumatology (Oxford)*, *57*(suppl\_4), iv34-iv42. doi:10.1093/rheumatology/kex417
- 12 Gaber, T., Strehl, C., & Buttgereit, F. (2017). Metabolic regulation of inflammation. *Nat Rev Rheumatol*,  
13 *13*(5), 267-279. doi:10.1038/nrrheum.2017.37
- 14 Goldring, M. B., & Otero, M. (2011). Inflammation in osteoarthritis. *Curr Opin Rheumatol*, *23*(5), 471-  
15 478. doi:10.1097/BOR.0b013e328349c2b1
- 16 Hermann, W., Lambova, S., & Muller-Ladner, U. (2018). Current Treatment Options for Osteoarthritis.  
17 *Curr Rheumatol Rev*, *14*(2), 108-116. doi:10.2174/1573397113666170829155149
- 18 Herranz, D. (2017). Glutaminolysis gets the spotlight in cancer. *Oncotarget*, *8*(7), 10761-10762.  
19 doi:10.18632/oncotarget.14384
- 20 Hwang, I. Y., Kwak, S., Lee, S., Kim, H., Lee, S. E., Kim, J. H., . . . Youn, H. D. (2016). Psat1-Dependent  
21 Fluctuations in alpha-Ketoglutarate Affect the Timing of ESC Differentiation. *Cell Metab*, *24*(3),  
22 494-501. doi:10.1016/j.cmet.2016.06.014
- 23 Jin, H. O., Hong, S. E., Kim, J. Y., Jang, S. K., & Park, I. C. (2021). Amino acid deprivation induces AKT  
24 activation by inducing GCN2/ATF4/REDD1 axis. *Cell Death Dis*, *12*(12), 1127.  
25 doi:10.1038/s41419-021-04417-w
- 26 Johnson, S. C., Rabinovitch, P. S., & Kaeberlein, M. (2013). mTOR is a key modulator of ageing and age-  
27 related disease. *Nature*, *493*(7432), 338-345. doi:10.1038/nature11861
- 28 Kim, S., Hwang, J., Xuan, J., Jung, Y. H., Cha, H. S., & Kim, K. H. (2014). Global metabolite profiling of  
29 synovial fluid for the specific diagnosis of rheumatoid arthritis from other inflammatory  
30 arthritis. *PLoS One*, *9*(6), e97501. doi:10.1371/journal.pone.0097501
- 31 Kurmi, K., & Haigis, M. C. (2020). Nitrogen Metabolism in Cancer and Immunity. *Trends Cell Biol*, *30*(5),  
32 408-424. doi:10.1016/j.tcb.2020.02.005
- 33 Li, C., Allen, A., Kwagh, J., Doliba, N. M., Qin, W., Najafi, H., . . . Smith, T. J. (2006). Green tea  
34 polyphenols modulate insulin secretion by inhibiting glutamate dehydrogenase. *J Biol Chem*,  
35 *281*(15), 10214-10221. doi:10.1074/jbc.M512792200
- 36 Linke, M., Fritsch, S. D., Sukhbaatar, N., Hengstschlager, M., & Weichhart, T. (2017). mTORC1 and  
37 mTORC2 as regulators of cell metabolism in immunity. *FEBS Lett*, *591*(19), 3089-3103.  
38 doi:10.1002/1873-3468.12711
- 39 Liu-Bryan, R. (2015). Inflammation and intracellular metabolism: new targets in OA. *Osteoarthritis*  
40 *Cartilage*, *23*(11), 1835-1842. doi:10.1016/j.joca.2014.12.016
- 41 Liu-Bryan, R., & Terkeltaub, R. (2015). Emerging regulators of the inflammatory process in  
42 osteoarthritis. *Nat Rev Rheumatol*, *11*(1), 35-44. doi:10.1038/nrrheum.2014.162
- 43 Lopez-Armada, M. J., Carames, B., Martin, M. A., Cillero-Pastor, B., Lires-Dean, M., Fuentes-Boquete, I.,  
44 . . . Blanco, F. J. (2006). Mitochondrial activity is modulated by TNFalpha and IL-1beta in normal

- 1 human chondrocyte cells. *Osteoarthritis Cartilage*, 14(10), 1011-1022.  
2 doi:10.1016/j.joca.2006.03.008
- 3 Lu, S., & Wang, Y. (2018). Nonmetabolic functions of metabolic enzymes in cancer development.  
4 *Cancer Commun (Lond)*, 38(1), 63. doi:10.1186/s40880-018-0336-6
- 5 Magaway, C., Kim, E., & Jacinto, E. (2019). Targeting mTOR and Metabolism in Cancer: Lessons and  
6 Innovations. *Cells*, 8(12). doi:10.3390/cells8121584
- 7 Martinez-Reyes, I., & Chandel, N. S. (2020). Mitochondrial TCA cycle metabolites control physiology  
8 and disease. *Nat Commun*, 11(1), 102. doi:10.1038/s41467-019-13668-3
- 9 Mattson, M. P., & de Cabo, R. (2020). Effects of Intermittent Fasting on Health, Aging, and Disease.  
10 Reply. *N Engl J Med*, 382(18), 1773-1774. doi:10.1056/NEJMc2001176
- 11 Meiser, J., Kramer, L., Sapcariu, S. C., Battello, N., Ghelfi, J., D'Herouel, A. F., . . . Hiller, K. (2016). Pro-  
12 inflammatory Macrophages Sustain Pyruvate Oxidation through Pyruvate Dehydrogenase for  
13 the Synthesis of Itaconate and to Enable Cytokine Expression. *J Biol Chem*, 291(8), 3932-3946.  
14 doi:10.1074/jbc.M115.676817
- 15 Mobasheri, A., & Batt, M. (2016). An update on the pathophysiology of osteoarthritis. *Ann Phys Rehabil*  
16 *Med*, 59(5-6), 333-339. doi:10.1016/j.rehab.2016.07.004
- 17 O'Leary, E. M., Tian, Y., Nigdelioglu, R., Witt, L. J., Cetin-Atalay, R., Meliton, A. Y., . . . Hamanaka, R. B.  
18 (2020). TGF-beta Promotes Metabolic Reprogramming in Lung Fibroblasts via mTORC1-  
19 dependent ATF4 Activation. *Am J Respir Cell Mol Biol*, 63(5), 601-612. doi:10.1165/rcmb.2020-  
20 01430C
- 21 Ohashi, Y., Takahashi, N., Terabe, K., Tsuchiya, S., Kojima, T., Knudson, C. B., . . . Imagama, S. (2021).  
22 Metabolic reprogramming in chondrocytes to promote mitochondrial respiration reduces  
23 downstream features of osteoarthritis. *Sci Rep*, 11(1), 15131. doi:10.1038/s41598-021-94611-9
- 24 Palfreeman, A. C., McNamee, K. E., & McCann, F. E. (2013). New developments in the management of  
25 psoriasis and psoriatic arthritis: a focus on apremilast. *Drug Des Devel Ther*, 7, 201-210.  
26 doi:10.2147/DDDT.S32713
- 27 Piepoli, T., Mennuni, L., Zerbi, S., Lanza, M., Rovati, L. C., & Caselli, G. (2009). Glutamate signaling in  
28 chondrocytes and the potential involvement of NMDA receptors in cell proliferation and  
29 inflammatory gene expression. *Osteoarthritis Cartilage*, 17(8), 1076-1083.  
30 doi:10.1016/j.joca.2009.02.002
- 31 Roos, E. M., & Arden, N. K. (2016). Strategies for the prevention of knee osteoarthritis. *Nat Rev*  
32 *Rheumatol*, 12(2), 92-101. doi:10.1038/nrrheum.2015.135
- 33 Russell, R. C., Yuan, H. X., & Guan, K. L. (2014). Autophagy regulation by nutrient signaling. *Cell Res*,  
34 24(1), 42-57. doi:10.1038/cr.2013.166
- 35 Sellam, J., & Berenbaum, F. (2013). Is osteoarthritis a metabolic disease? *Joint Bone Spine*, 80(6), 568-  
36 573. doi:10.1016/j.jbspin.2013.09.007
- 37 Shams, S., Martinez, J. M., Dawson, J. R. D., Flores, J., Gabriel, M., Garcia, G., . . . Ashouri, J. F. (2021).  
38 The Therapeutic Landscape of Rheumatoid Arthritis: Current State and Future Directions. *Front*  
39 *Pharmacol*, 12, 680043. doi:10.3389/fphar.2021.680043
- 40 Shen, J., Wang, C., Ying, J., Xu, T., McAlinden, A., & O'Keefe, R. J. (2019). Inhibition of 4-aminobutyrate  
41 aminotransferase protects against injury-induced osteoarthritis in mice. *JCI Insight*, 4(18).  
42 doi:10.1172/jci.insight.128568

- 1 Soria, L. R., & Brunetti-Pierri, N. (2019). Ammonia and autophagy: An emerging relationship with  
2 implications for disorders with hyperammonemia. *J Inherit Metab Dis*, 42(6), 1097-1104.  
3 doi:10.1002/jimd.12061
- 4 Spinelli, J. B., Yoon, H., Ringel, A. E., Jeanfavre, S., Clish, C. B., & Haigis, M. C. (2017). Metabolic  
5 recycling of ammonia via glutamate dehydrogenase supports breast cancer biomass. *Science*,  
6 358(6365), 941-946. doi:10.1126/science.aam9305
- 7 Stegen, S., Loopmans, S., Stockmans, I., Moermans, K., Carmeliet, P., & Carmeliet, G. (2022). De novo  
8 serine synthesis regulates chondrocyte proliferation during bone development and repair. *Bone*  
9 *Res*, 10(1), 14. doi:10.1038/s41413-021-00185-7
- 10 Stegen, S., Rinaldi, G., Loopmans, S., Stockmans, I., Moermans, K., Thienpont, B., . . . Carmeliet, G.  
11 (2020). Glutamine Metabolism Controls Chondrocyte Identity and Function. *Dev Cell*, 53(5),  
12 530-544 e538. doi:10.1016/j.devcel.2020.05.001
- 13 van den Bosch, M. H. J. (2019). Inflammation in osteoarthritis: is it time to dampen the alarm(in) in this  
14 debilitating disease? *Clin Exp Immunol*, 195(2), 153-166. doi:10.1111/cei.13237
- 15 Ye, J., Kumanova, M., Hart, L. S., Sloane, K., Zhang, H., De Panis, D. N., . . . Koumenis, C. (2010). The  
16 GCN2-ATF4 pathway is critical for tumour cell survival and proliferation in response to nutrient  
17 deprivation. *EMBO J*, 29(12), 2082-2096. doi:10.1038/emboj.2010.81
- 18 Yoo, H. C., Yu, Y. C., Sung, Y., & Han, J. M. (2020). Glutamine reliance in cell metabolism. *Exp Mol Med*,  
19 52(9), 1496-1516. doi:10.1038/s12276-020-00504-8
- 20 Zhai, G. (2019). Alteration of Metabolic Pathways in Osteoarthritis. *Metabolites*, 9(1).  
21 doi:10.3390/metabo9010011
- 22 Zheng, K., Shen, N., Chen, H., Ni, S., Zhang, T., Hu, M., . . . Yang, X. (2017). Global and targeted  
23 metabolomics of synovial fluid discovers special osteoarthritis metabolites. *J Orthop Res*, 35(9),  
24 1973-1981. doi:10.1002/jor.23482
- 25 Zheng, L., Zhang, Z., Sheng, P., & Mobasher, A. (2021). The role of metabolism in chondrocyte  
26 dysfunction and the progression of osteoarthritis. *Ageing Res Rev*, 66, 101249.  
27 doi:10.1016/j.arr.2020.101249
- 28 Zhuo, Q., Yang, W., Chen, J., & Wang, Y. (2012). Metabolic syndrome meets osteoarthritis. *Nat Rev*  
29 *Rheumatol*, 8(12), 729-737. doi:10.1038/nrrheum.2012.135
- 30
